# Supplementary material for: Efficient synthesis of 4-sulfanylcoumarins from 3-bromo-coumarinsviaa highly selective DABCO-mediated one-pot thia-Michael addition/elimination process
Source: Royal Society of Chemistry journal article supplement (doi:10.1039/c9ra09545d), 2020-01-01
Supplement: c9ra09545d1.pdf [file c9ra09545d1.pdf]

## ***Supporting Information***

### **Efficient Synthesis of 4-Sulfanylcoumarins from 3-Bromocoumarins *via* a Highly Selective DABCO-Mediated One-pot Thia-Michael Addition/Elimination Process**

Vitor B. Mostardeiro,<sup>a</sup> Marina C. Dilelio,<sup>a</sup> Teodoro S. Kaufman<sup>b,\*</sup>  
and Claudio C. Silveira<sup>a,\*</sup>

<sup>a</sup>*Departamento de Química, Universidade Federal de Santa Maria, 97105-900, Santa Maria, RS, Brazil. E-mail: silveira@quimica.ufsm.br.*

<sup>b</sup>*Instituto de Química Rosario (IQUIR, CONICET-UNR), Suipacha 531, 2000 Rosario, Argentina.*

## Table of Contents

| Description                                                                                                            | Page N° |
|------------------------------------------------------------------------------------------------------------------------|---------|
| <b>Figure S1.</b> 400 MHz $^1\text{H}$ (top) and $^{13}\text{C}$ (bottom) NMR spectra of <b>3a</b> in $\text{CDCl}_3$  | 3       |
| <b>Figure S2.</b> 400 MHz $^1\text{H}$ (top) and $^{13}\text{C}$ (bottom) NMR spectra of <b>3b</b> in $\text{CDCl}_3$  | 4       |
| <b>Figure S3.</b> 400 MHz $^1\text{H}$ (top) and $^{13}\text{C}$ (bottom) NMR spectra of <b>3c</b> in $\text{CDCl}_3$  | 5       |
| <b>Figure S4.</b> 400 MHz $^1\text{H}$ (top) and $^{13}\text{C}$ (bottom) NMR spectra of <b>3d</b> in $\text{CDCl}_3$  | 6       |
| <b>Figure S5.</b> 400 MHz $^1\text{H}$ (top) and $^{13}\text{C}$ (bottom) NMR spectra of <b>3e</b> in $\text{CDCl}_3$  | 7       |
| <b>Figure S6.</b> 400 MHz $^1\text{H}$ (top) and $^{13}\text{C}$ (bottom) NMR spectra of <b>3f</b> in $\text{CDCl}_3$  | 8       |
| <b>Figure S7.</b> 400 MHz $^1\text{H}$ (top) and $^{13}\text{C}$ (bottom) NMR spectra of <b>3g</b> in $\text{CDCl}_3$  | 9       |
| <b>Figure S8.</b> 400 MHz $^1\text{H}$ (top) and $^{13}\text{C}$ (bottom) NMR spectra of <b>3h</b> in $\text{CDCl}_3$  | 10      |
| <b>Figure S9.</b> 400 MHz $^1\text{H}$ (top) and $^{13}\text{C}$ (bottom) NMR spectra of <b>3i</b> in $\text{CDCl}_3$  | 11      |
| <b>Figure S10.</b> 400 MHz $^1\text{H}$ (top) and $^{13}\text{C}$ (bottom) NMR spectra of <b>3j</b> in $\text{CDCl}_3$ | 12      |
| <b>Figure S11.</b> 400 MHz $^1\text{H}$ (top) and $^{13}\text{C}$ (bottom) NMR spectra of <b>3k</b> in $\text{CDCl}_3$ | 13      |
| <b>Figure S12.</b> 400 MHz $^1\text{H}$ (top) and $^{13}\text{C}$ (bottom) NMR spectra of <b>3l</b> in $\text{CDCl}_3$ | 14      |
| <b>Figure S13.</b> 400 MHz $^1\text{H}$ (top) and $^{13}\text{C}$ (bottom) NMR spectra of <b>5a</b> in $\text{CDCl}_3$ | 15      |
| <b>Figure S14.</b> 400 MHz $^1\text{H}$ (top) and $^{13}\text{C}$ (bottom) NMR spectra of <b>5b</b> in $\text{CDCl}_3$ | 16      |
| <b>Figure S15.</b> 400 MHz $^1\text{H}$ (top) and $^{13}\text{C}$ (bottom) NMR spectra of <b>5c</b> in $\text{CDCl}_3$ | 17      |
| <b>Figure S16.</b> 400 MHz $^1\text{H}$ (top) and $^{13}\text{C}$ (bottom) NMR spectra of <b>5d</b> in $\text{CDCl}_3$ | 18      |
| <b>Figure S17.</b> 400 MHz $^1\text{H}$ (top) and $^{13}\text{C}$ (bottom) NMR spectra of <b>7c</b> in $\text{CDCl}_3$ | 19      |
| <b>Figure S18.</b> 400 MHz $^1\text{H}$ (top) and $^{13}\text{C}$ (bottom) NMR spectra of <b>7d</b> in $\text{CDCl}_3$ | 20      |

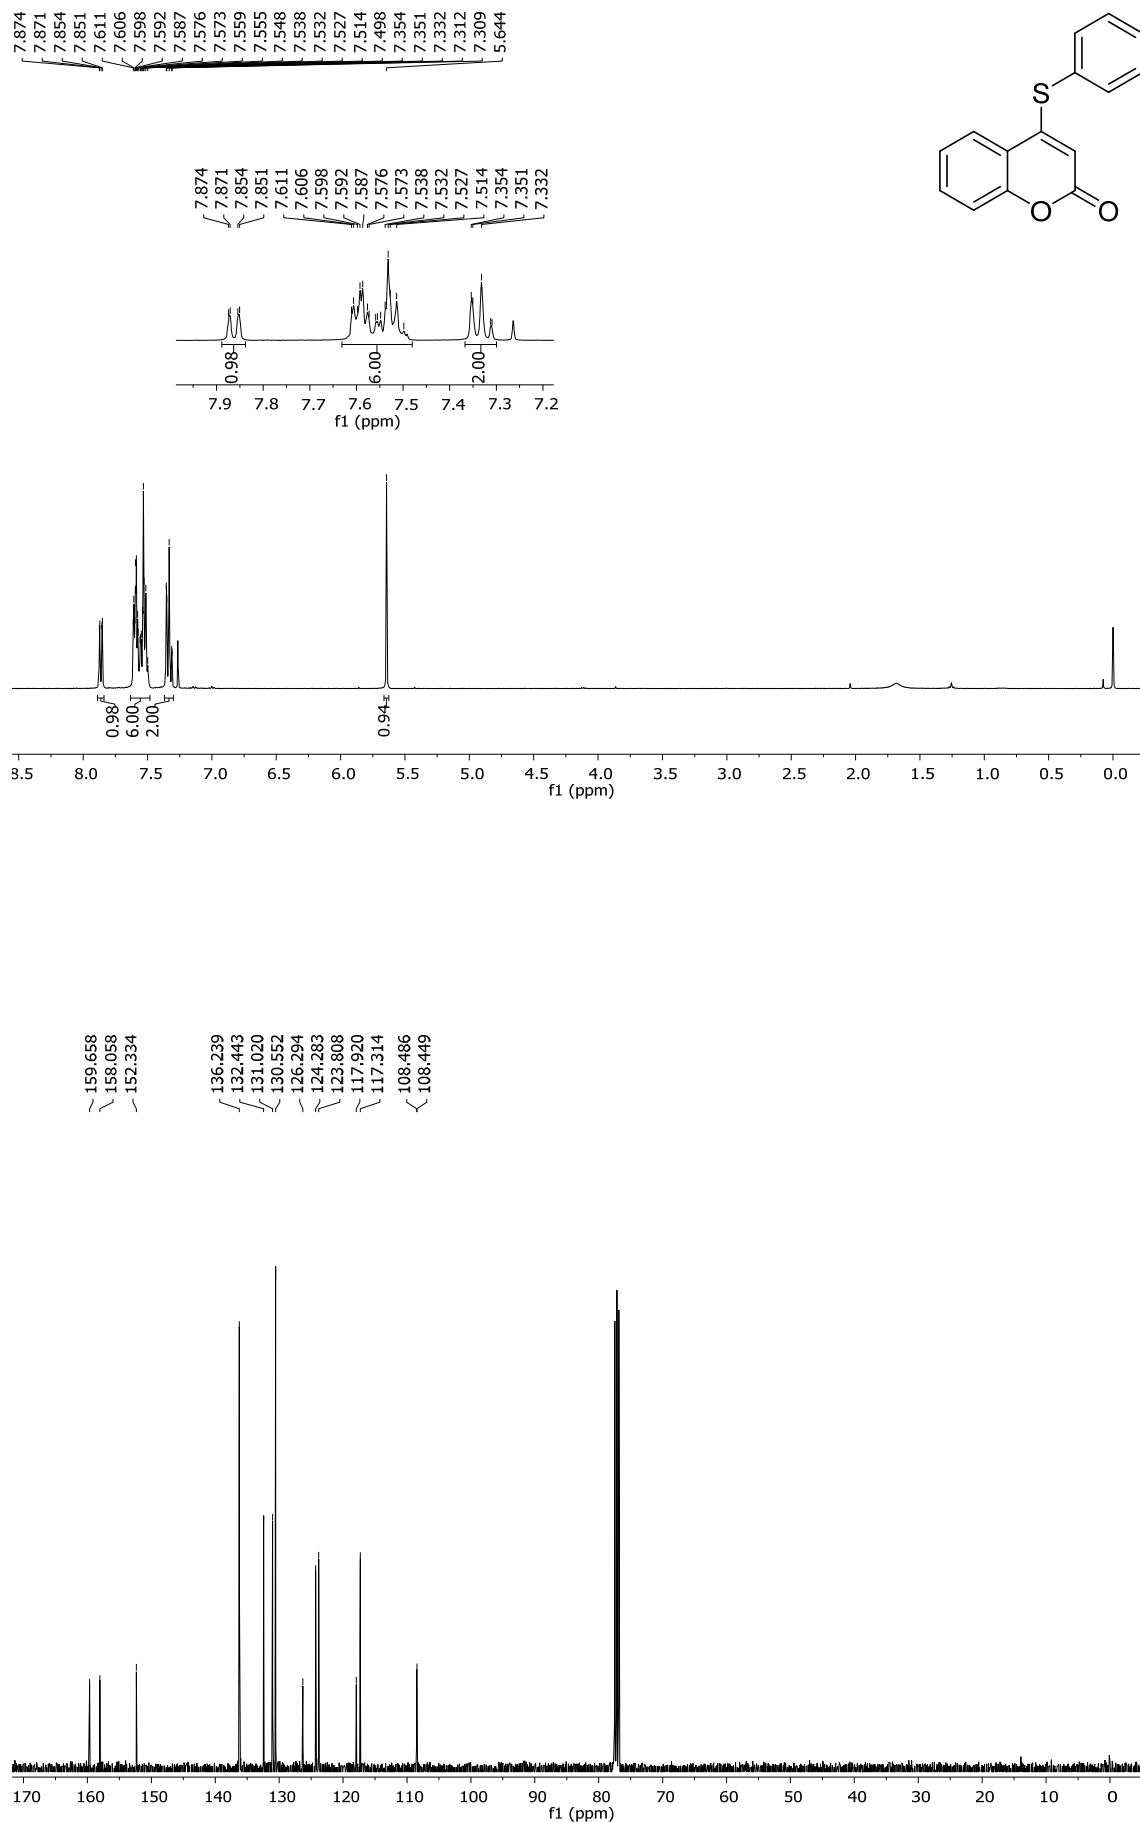

**Figure S1.** 400 MHz <sup>1</sup>H (top) and <sup>13</sup>C (bottom) NMR spectra of **3a** in CDCl<sub>3</sub>.

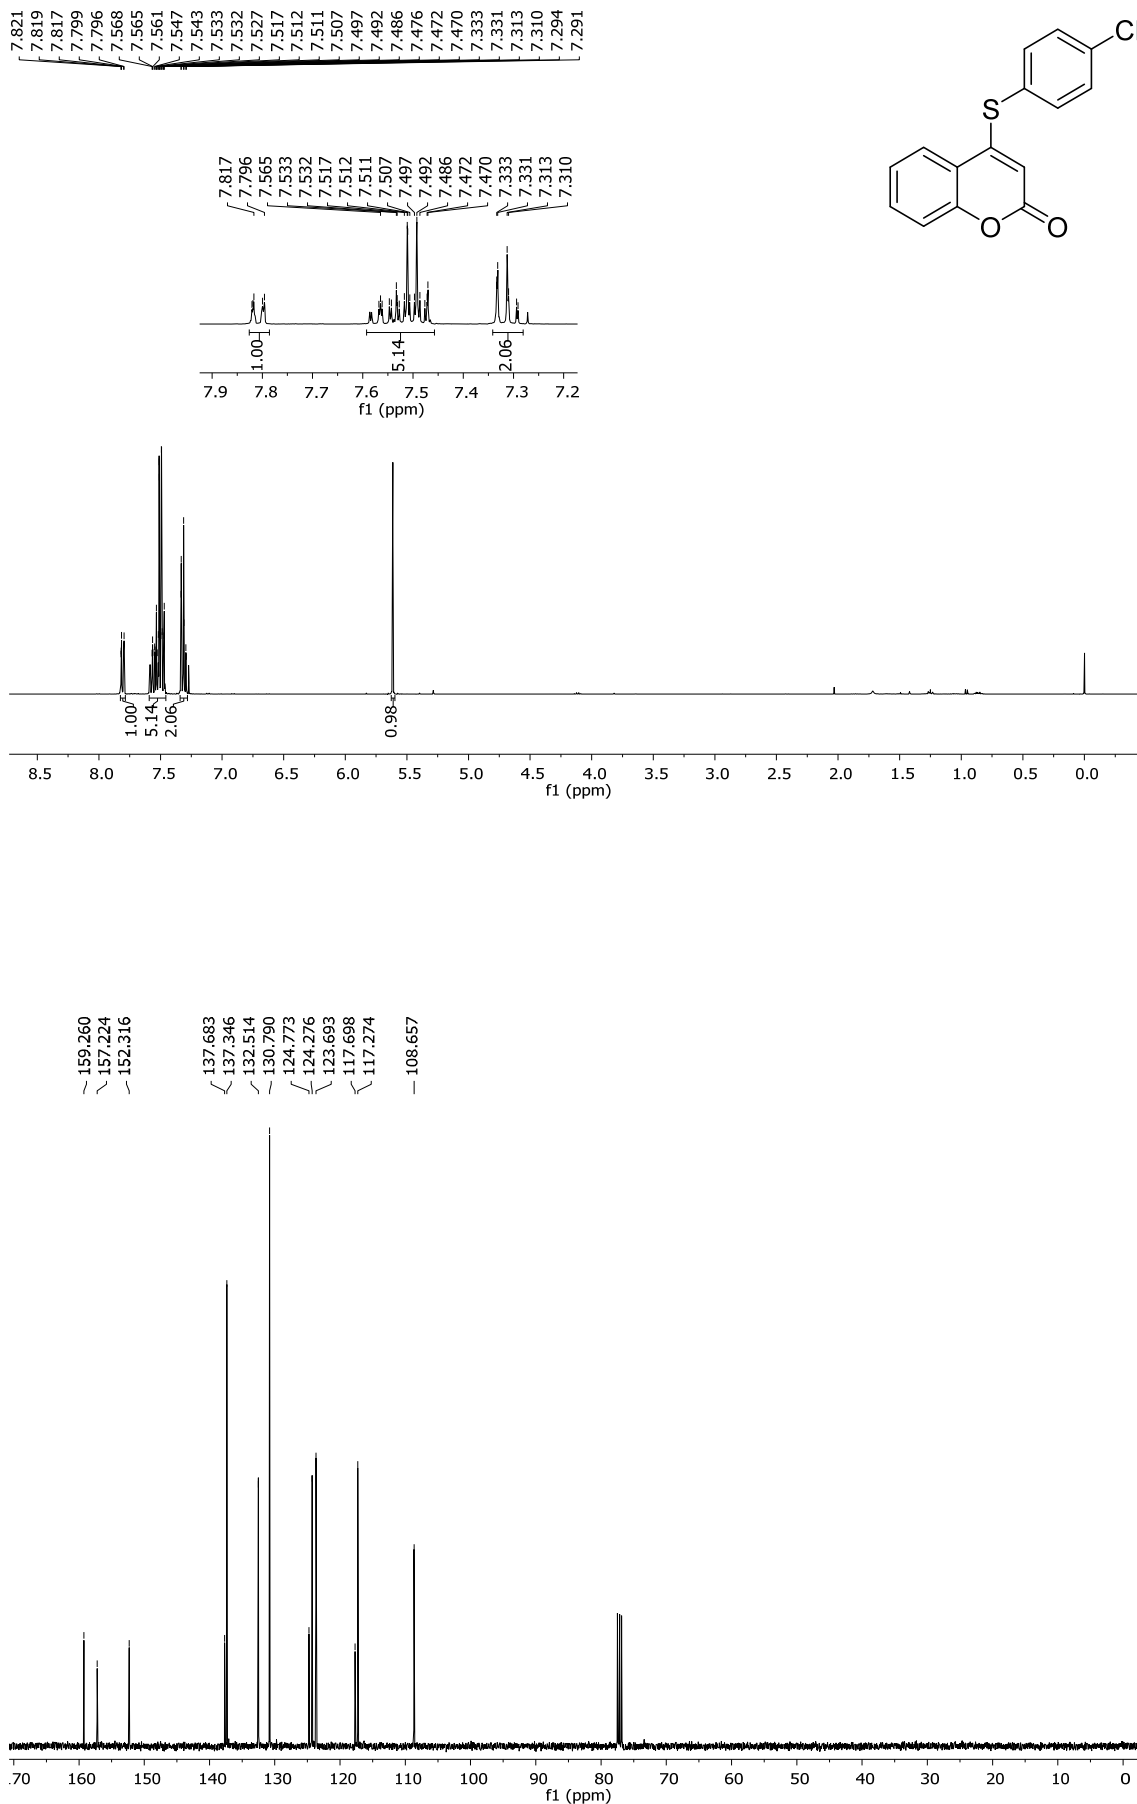

**Figure S2.** 400 MHz <sup>1</sup>H (top) and <sup>13</sup>C (bottom) NMR spectra of **3b** in CDCl<sub>3</sub>.

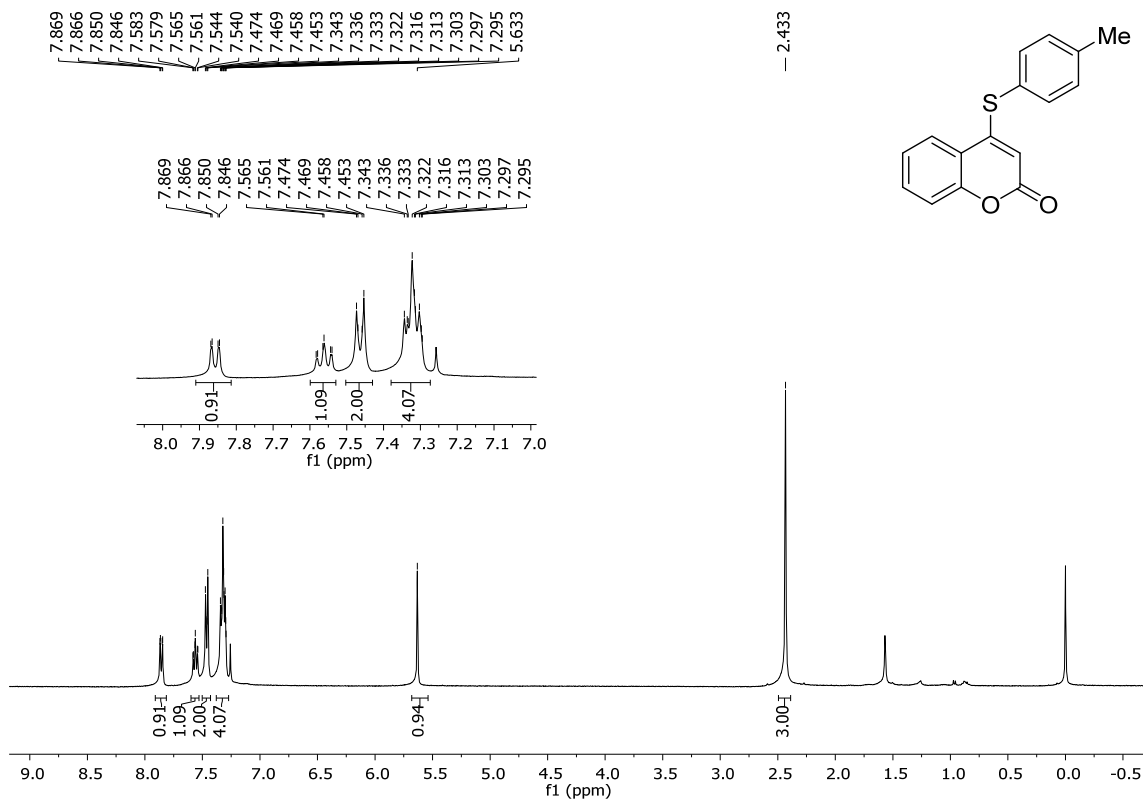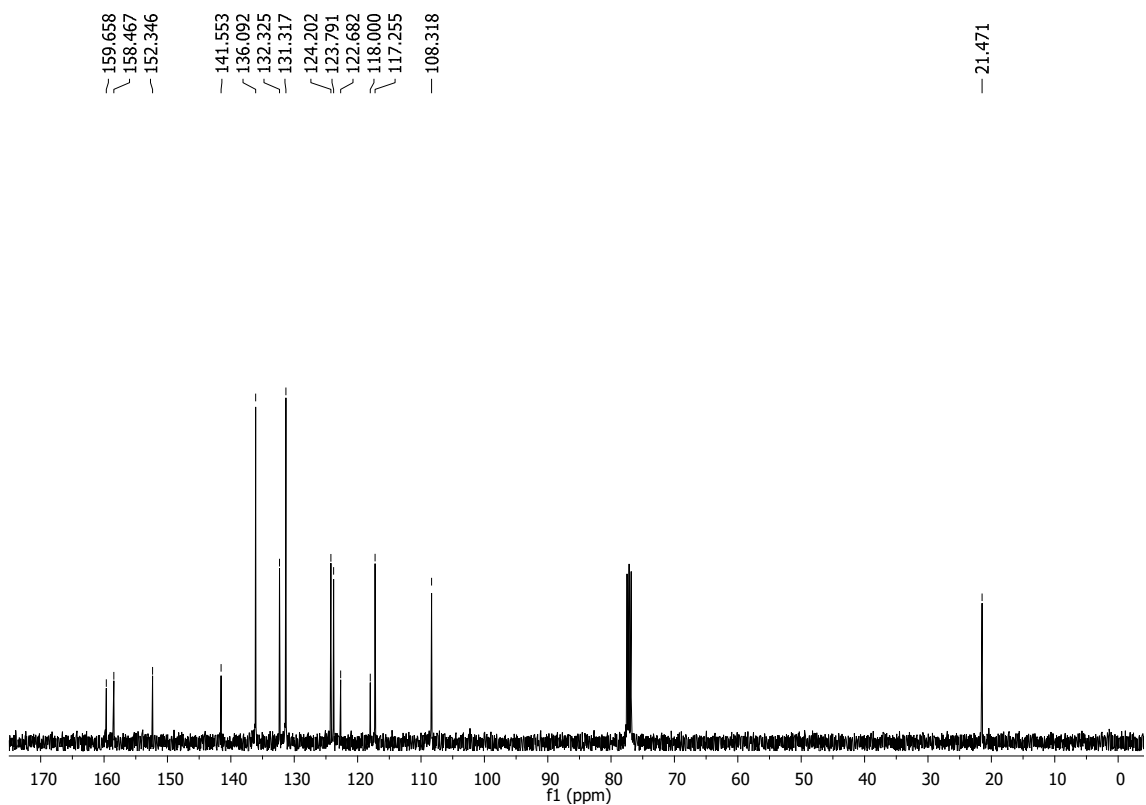

**Figure S3.** 400 MHz <sup>1</sup>H (top) and <sup>13</sup>C (bottom) NMR spectra of **3c** in CDCl<sub>3</sub>.

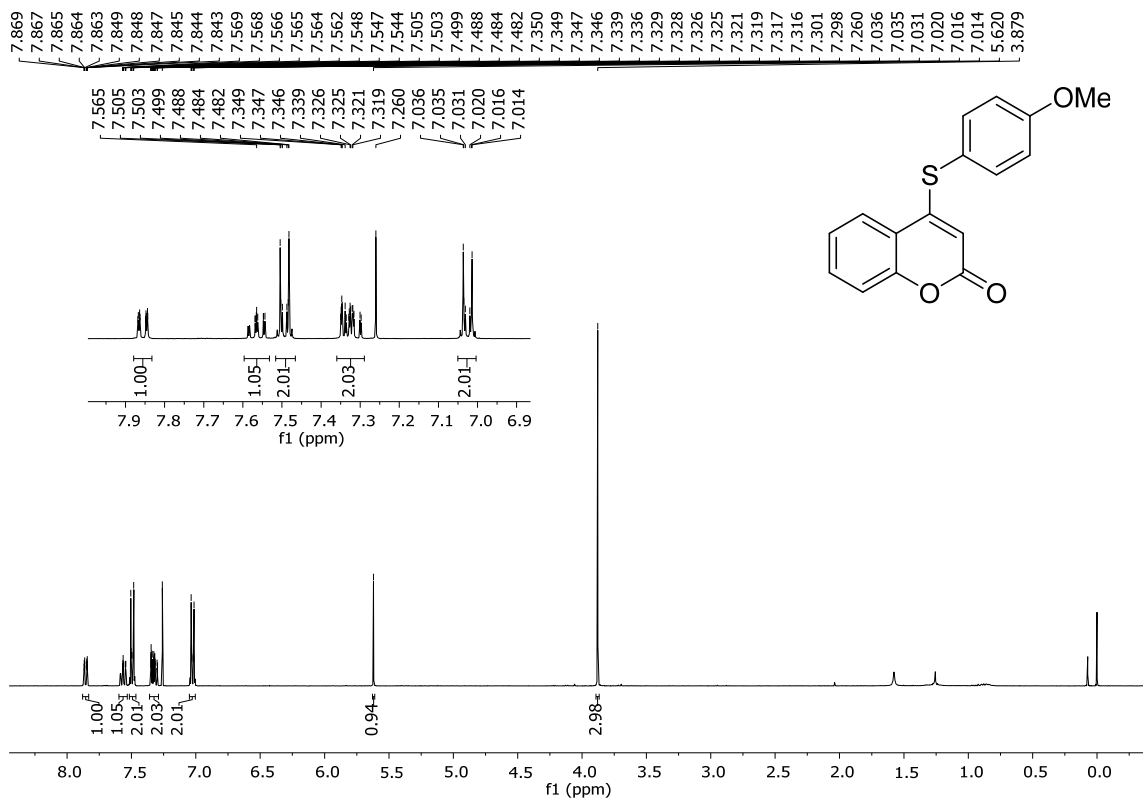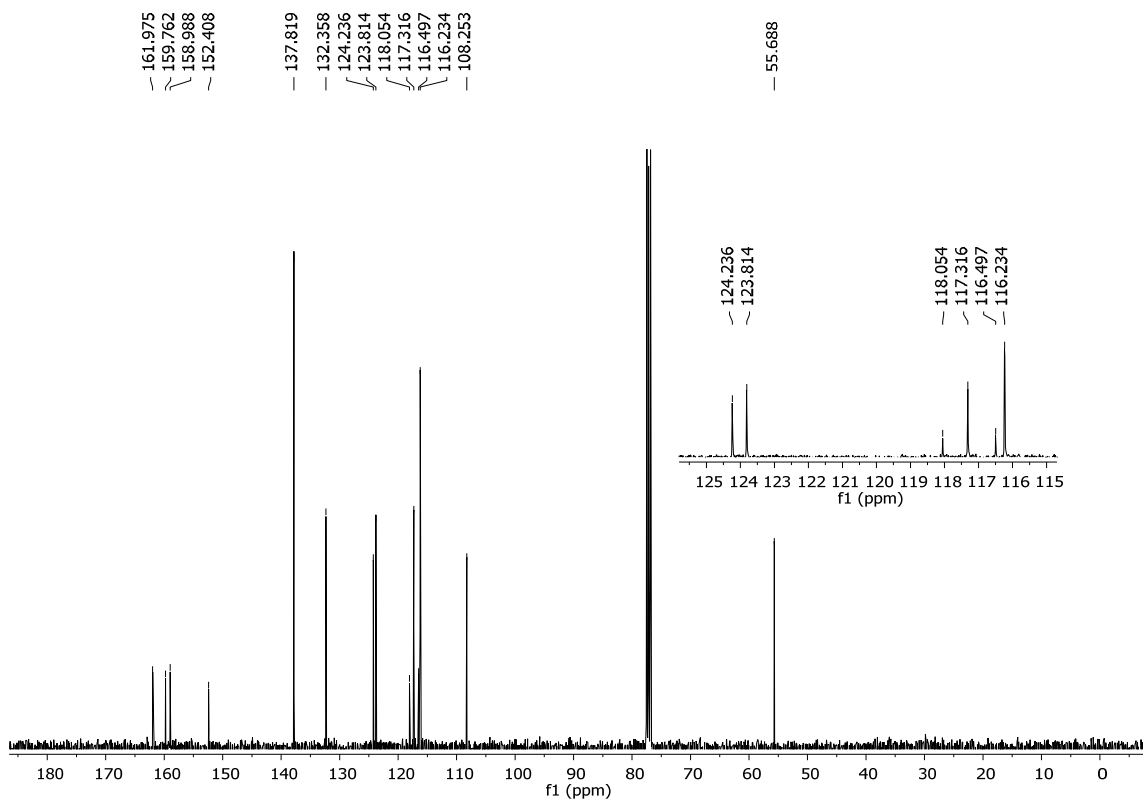

Figure S4. 400 MHz <sup>1</sup>H (top) and <sup>13</sup>C (bottom) NMR spectra of **3d** in CDCl<sub>3</sub>.

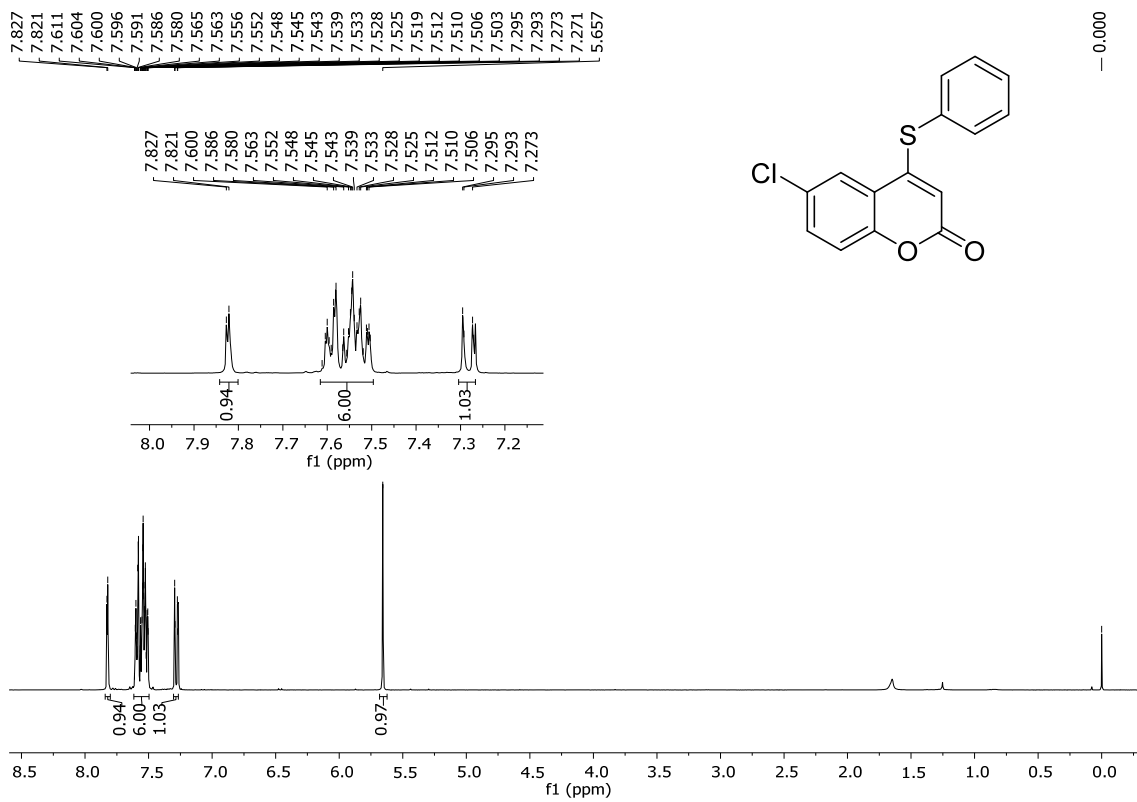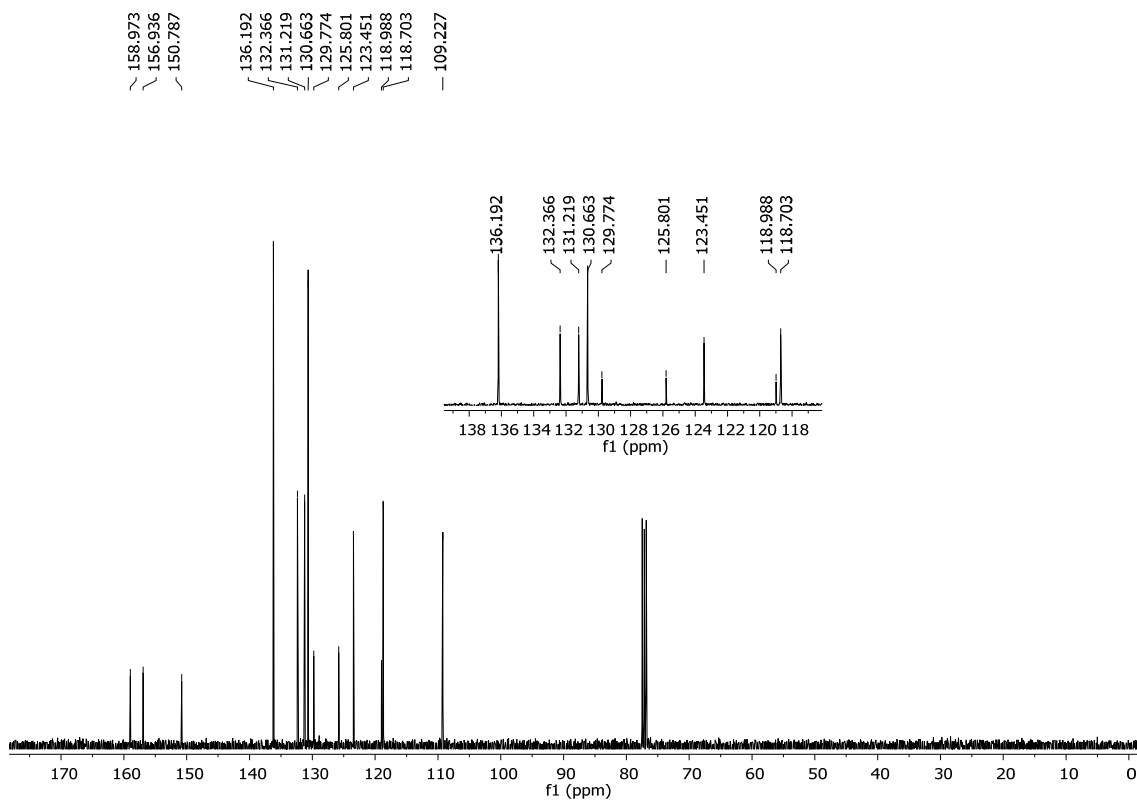

Figure S5. 400 MHz <sup>1</sup>H (top) and <sup>13</sup>C (bottom) NMR spectra of **3e** in CDCl<sub>3</sub>.

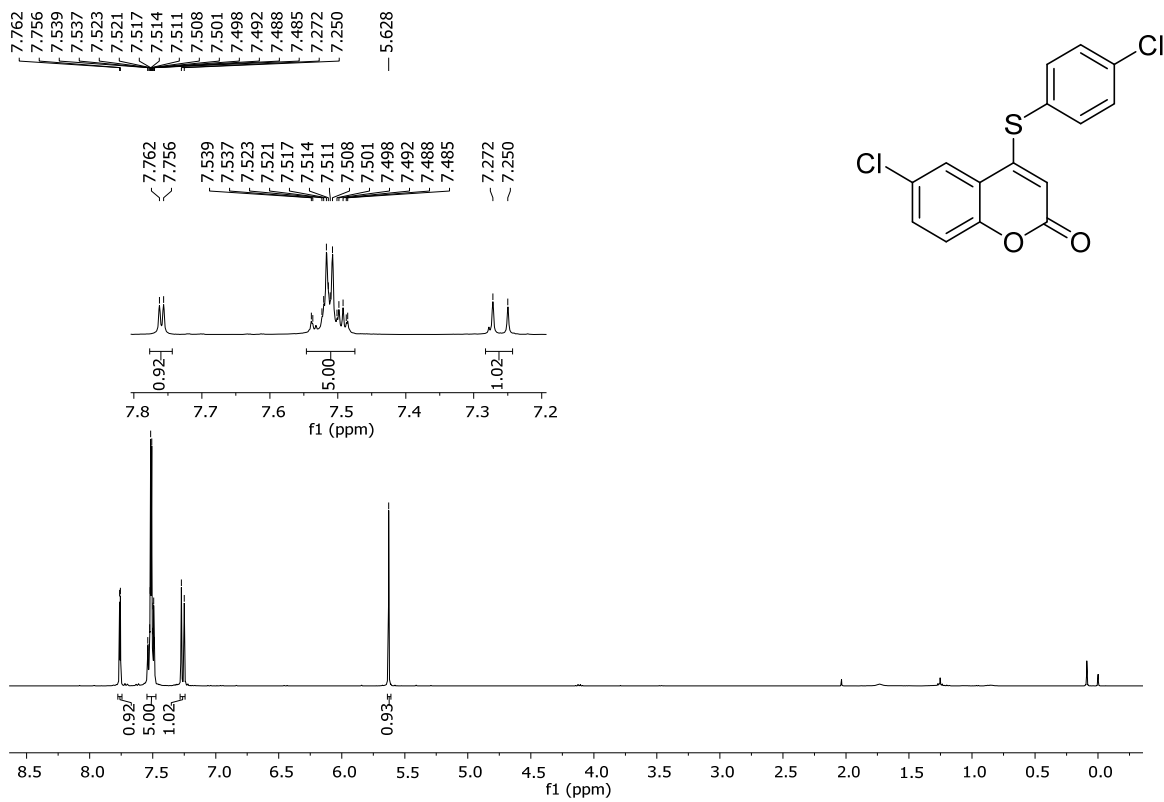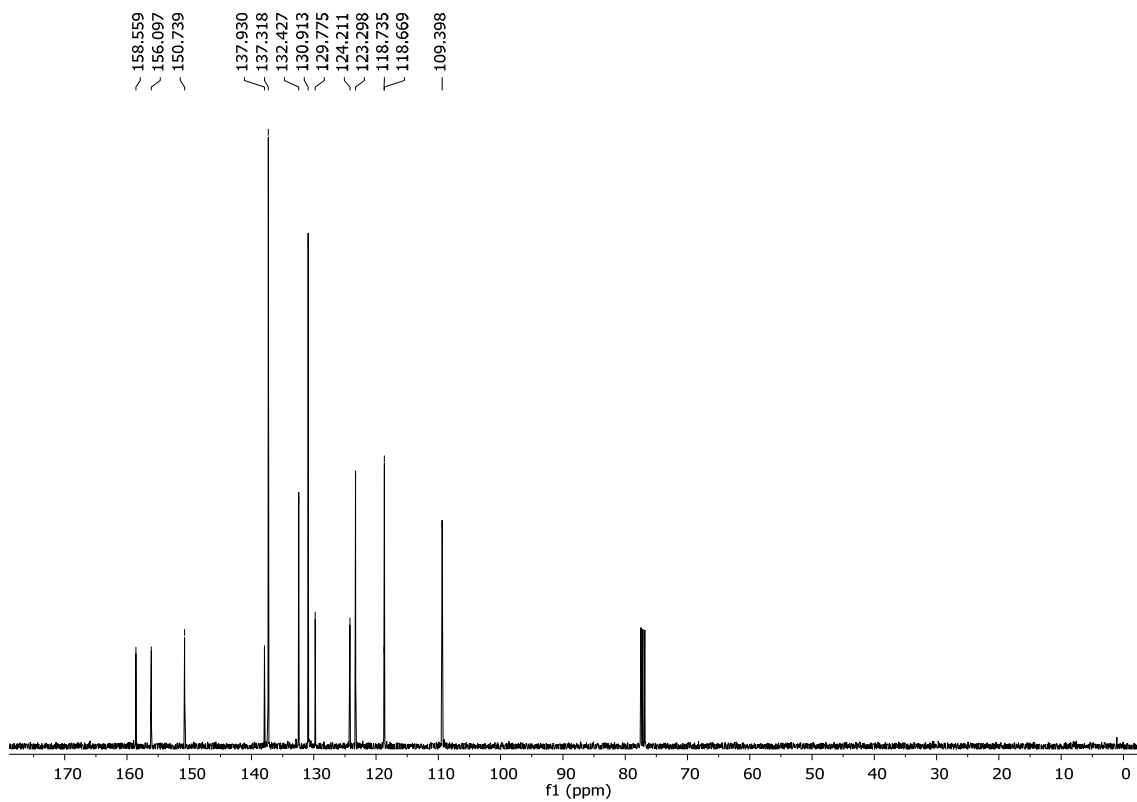

**Figure S6.** 400 MHz <sup>1</sup>H (top) and <sup>13</sup>C (bottom) NMR spectra of **3f** in CDCl<sub>3</sub>.



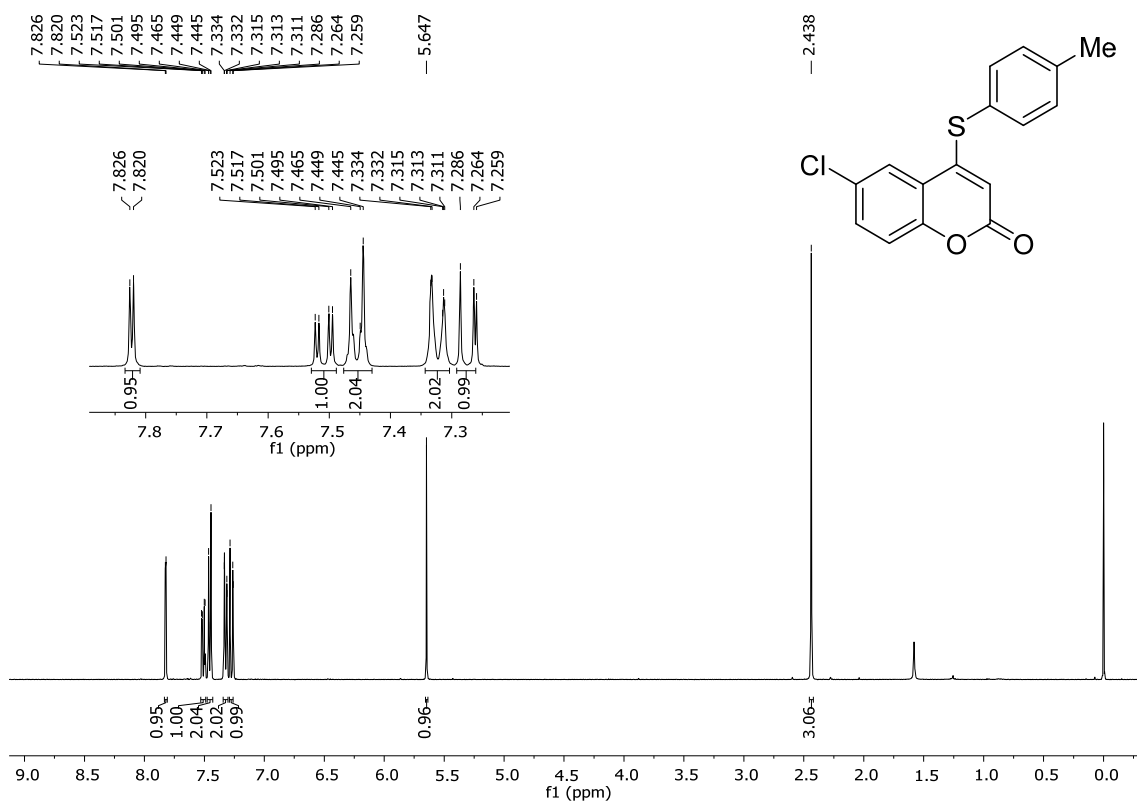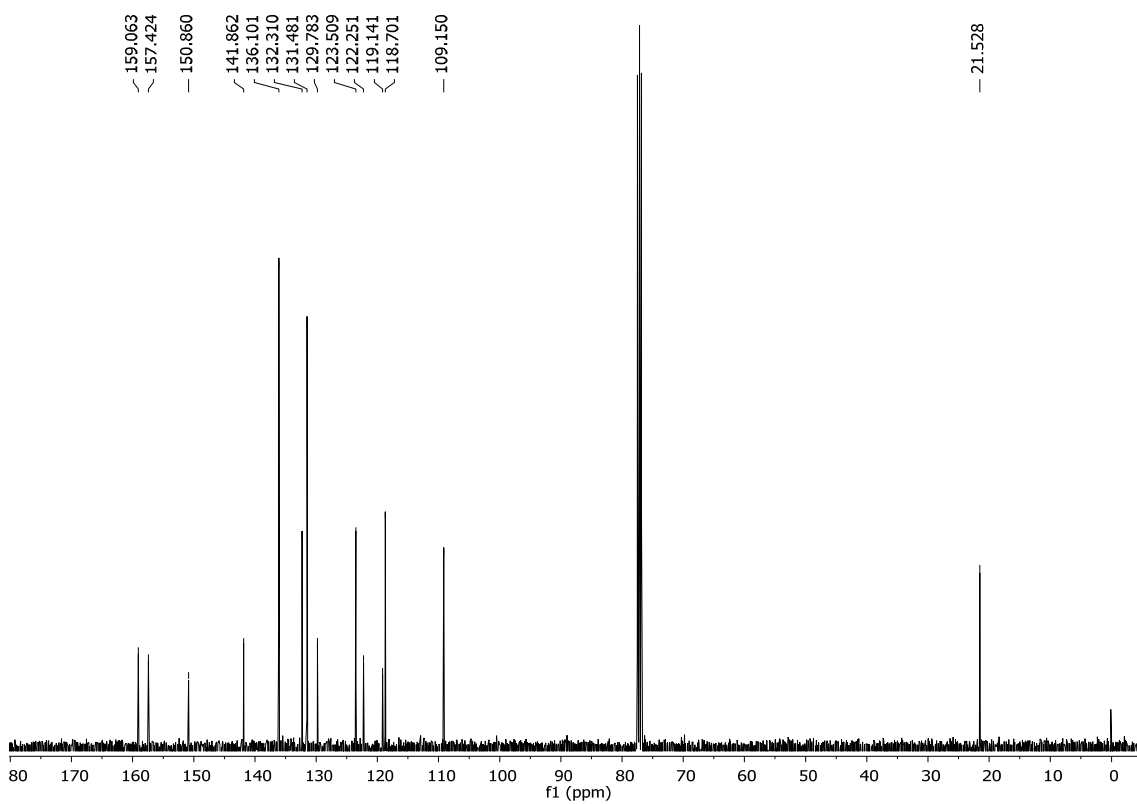

**Figure S7.** 400 MHz <sup>1</sup>H (top) and <sup>13</sup>C (bottom) NMR spectra of **3g** in CDCl<sub>3</sub>.

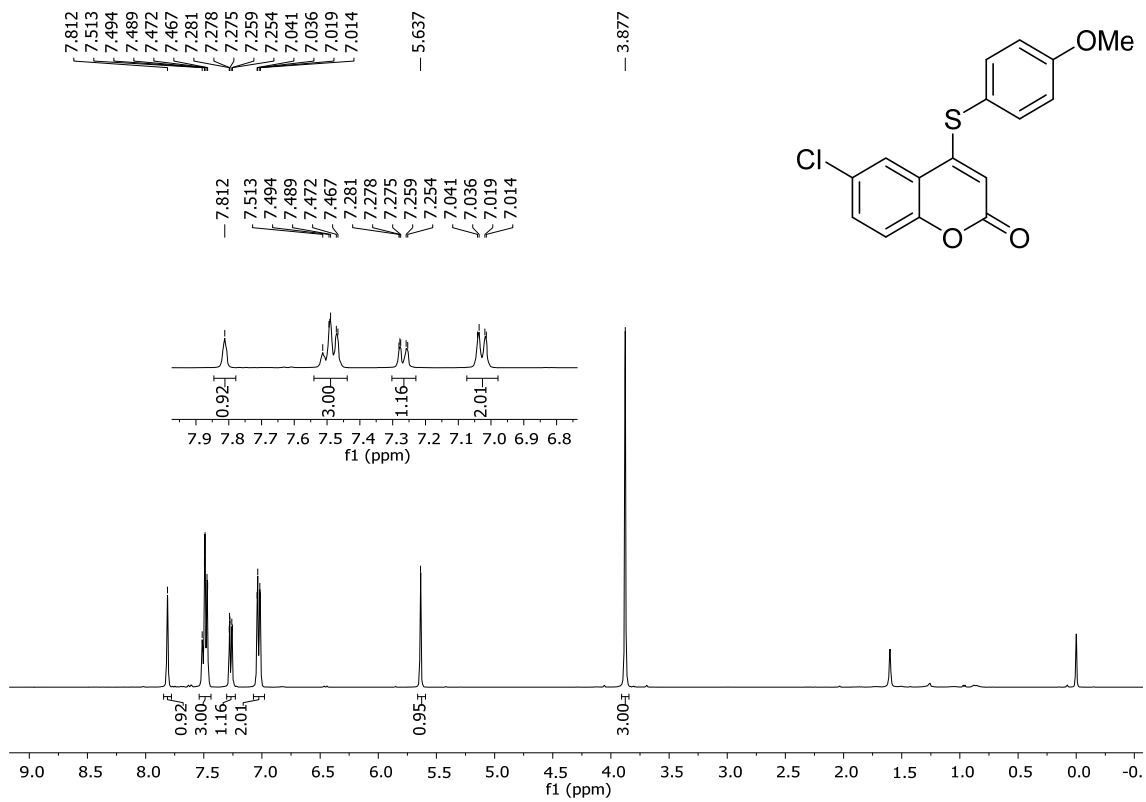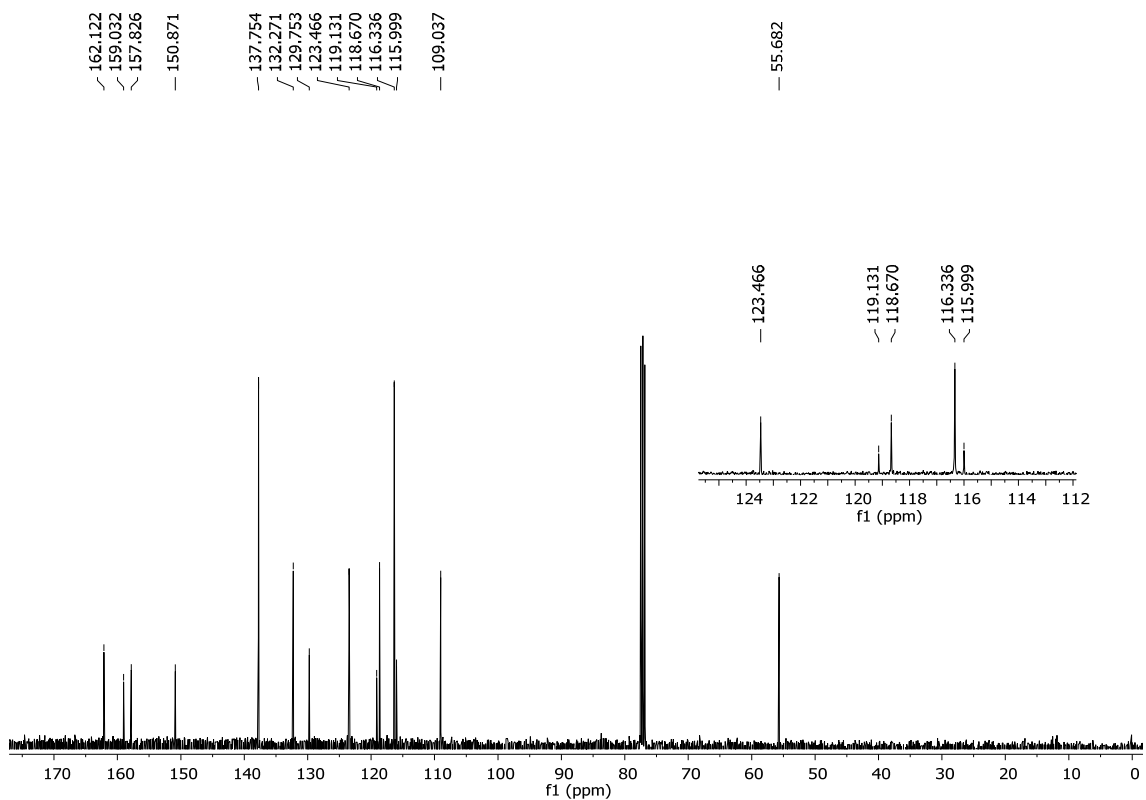

**Figure S8.** 400 MHz <sup>1</sup>H (top) and <sup>13</sup>C (bottom) NMR spectra of **3h** in CDCl<sub>3</sub>.

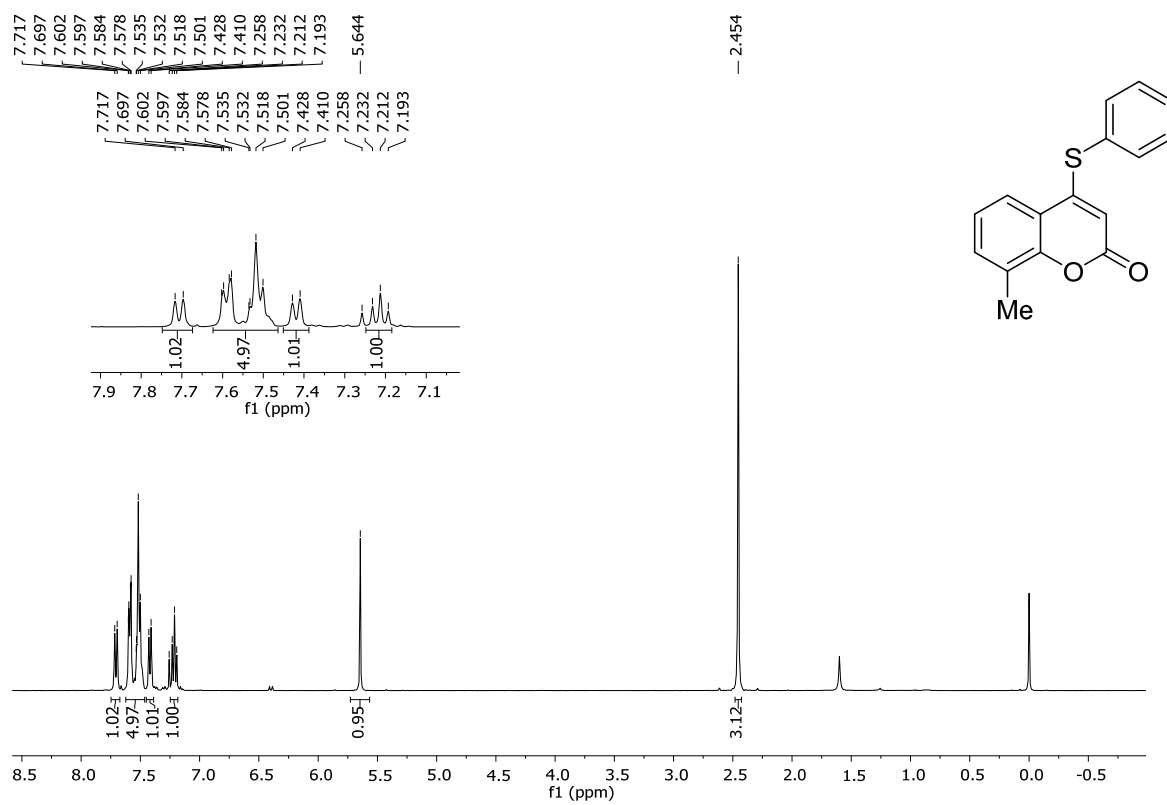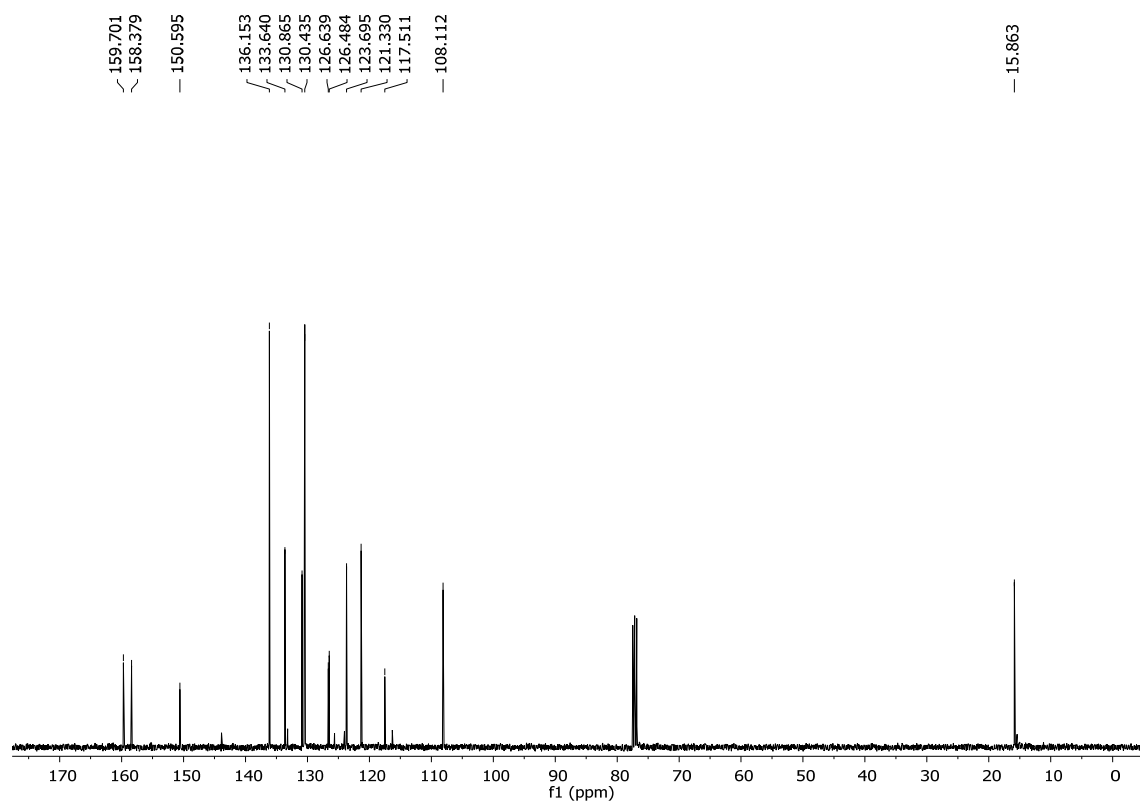

**Figure S9.** 400 MHz <sup>1</sup>H (top) and <sup>13</sup>C (bottom) NMR spectra of **3i** in CDCl<sub>3</sub>.

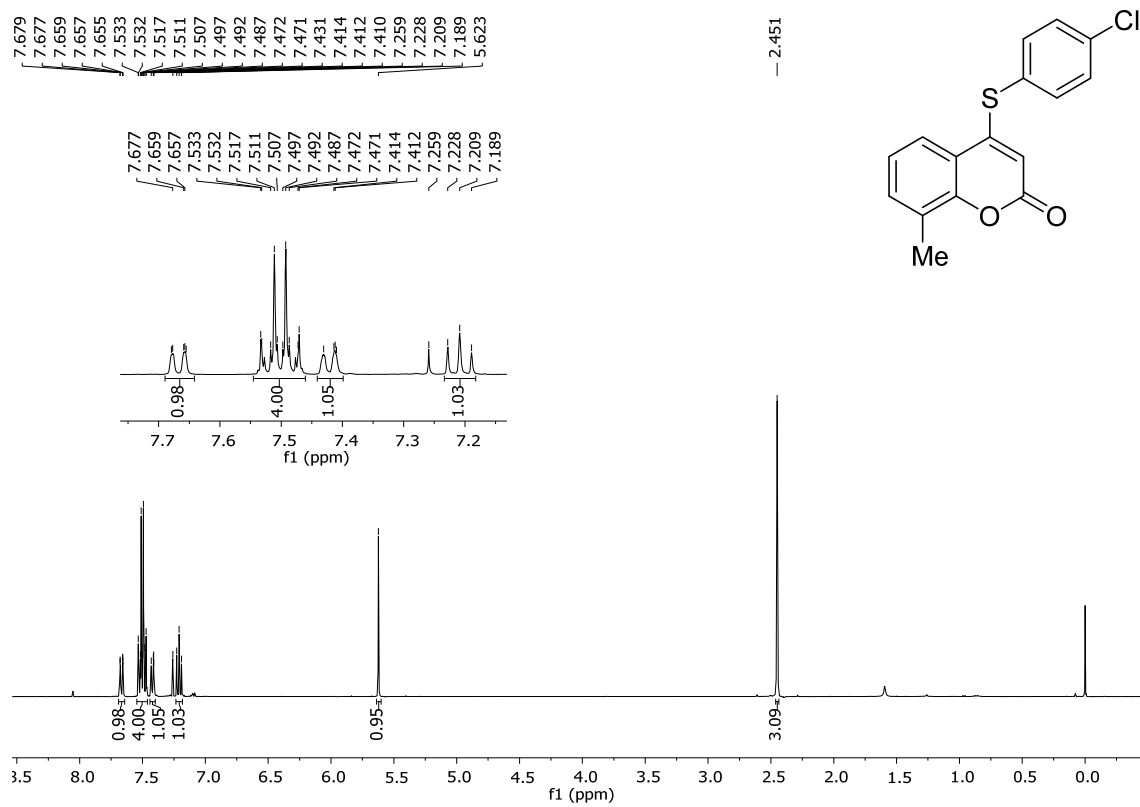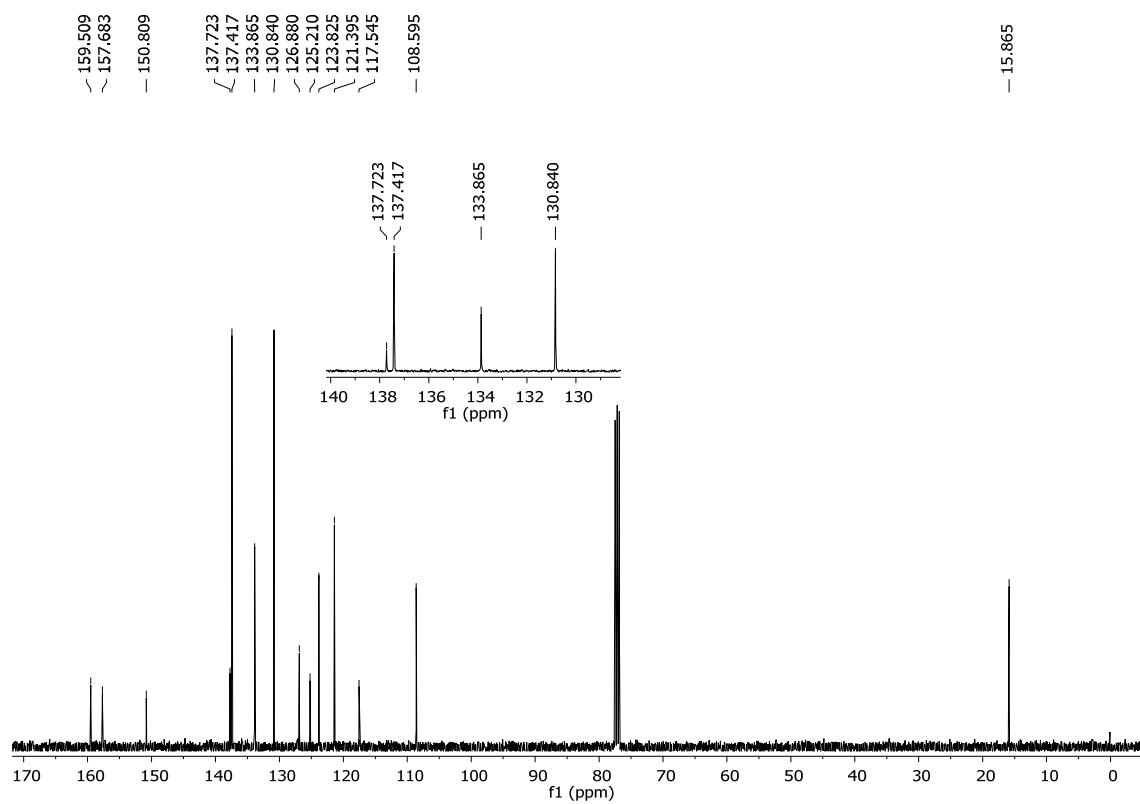

**Figure S10.** 400 MHz <sup>1</sup>H (top) and <sup>13</sup>C (bottom) NMR spectra of **3j** in CDCl<sub>3</sub>.

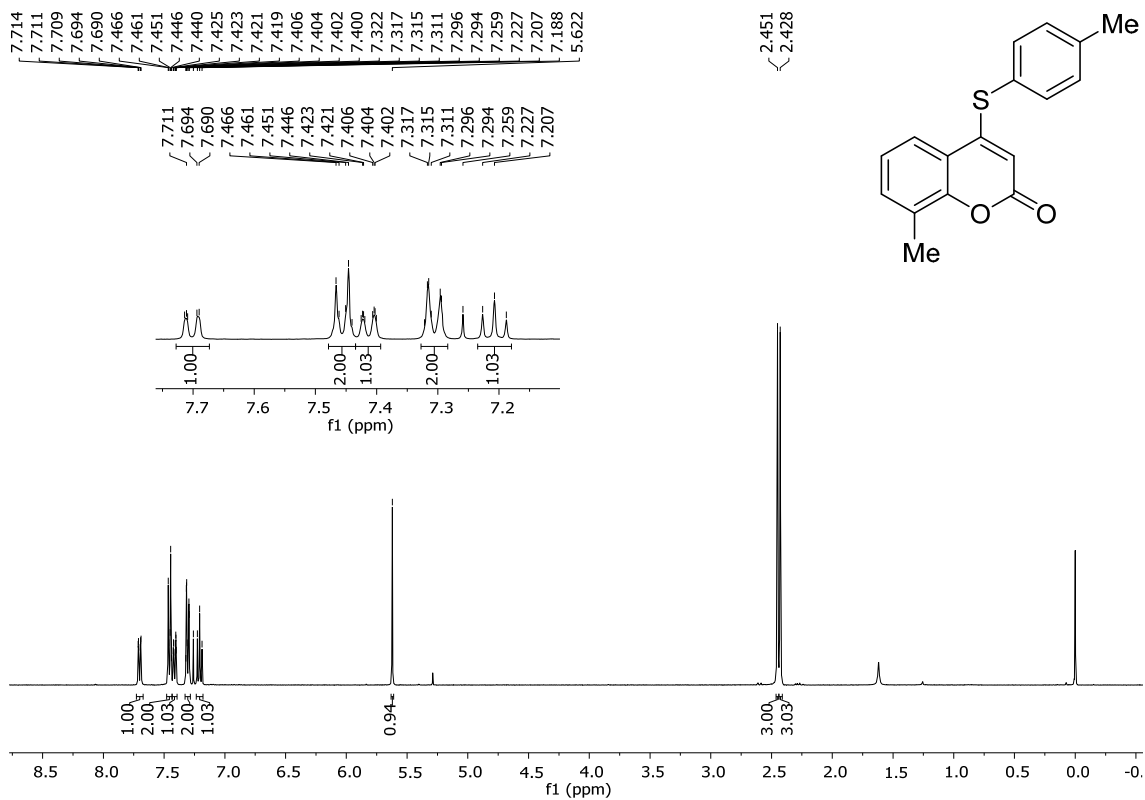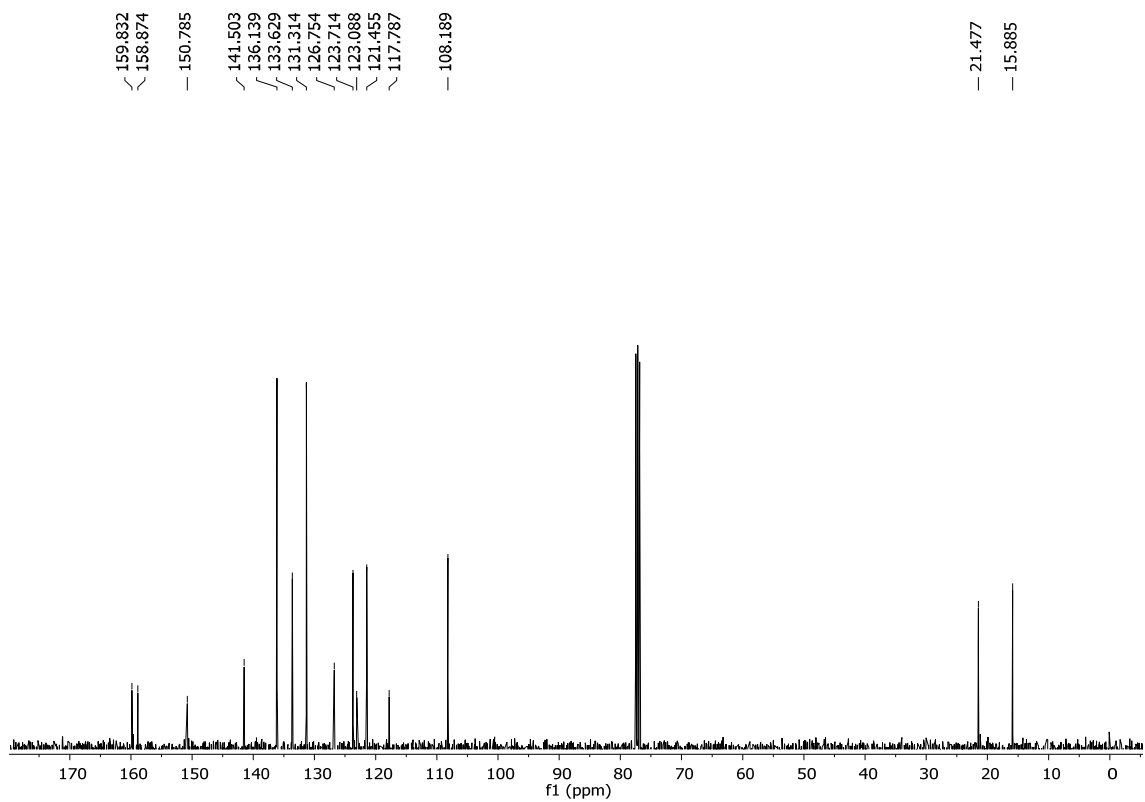

**Figure S11.** 400 MHz  $^1\text{H}$  (top) and  $^{13}\text{C}$  (bottom) NMR spectra of **3k** in  $\text{CDCl}_3$ .

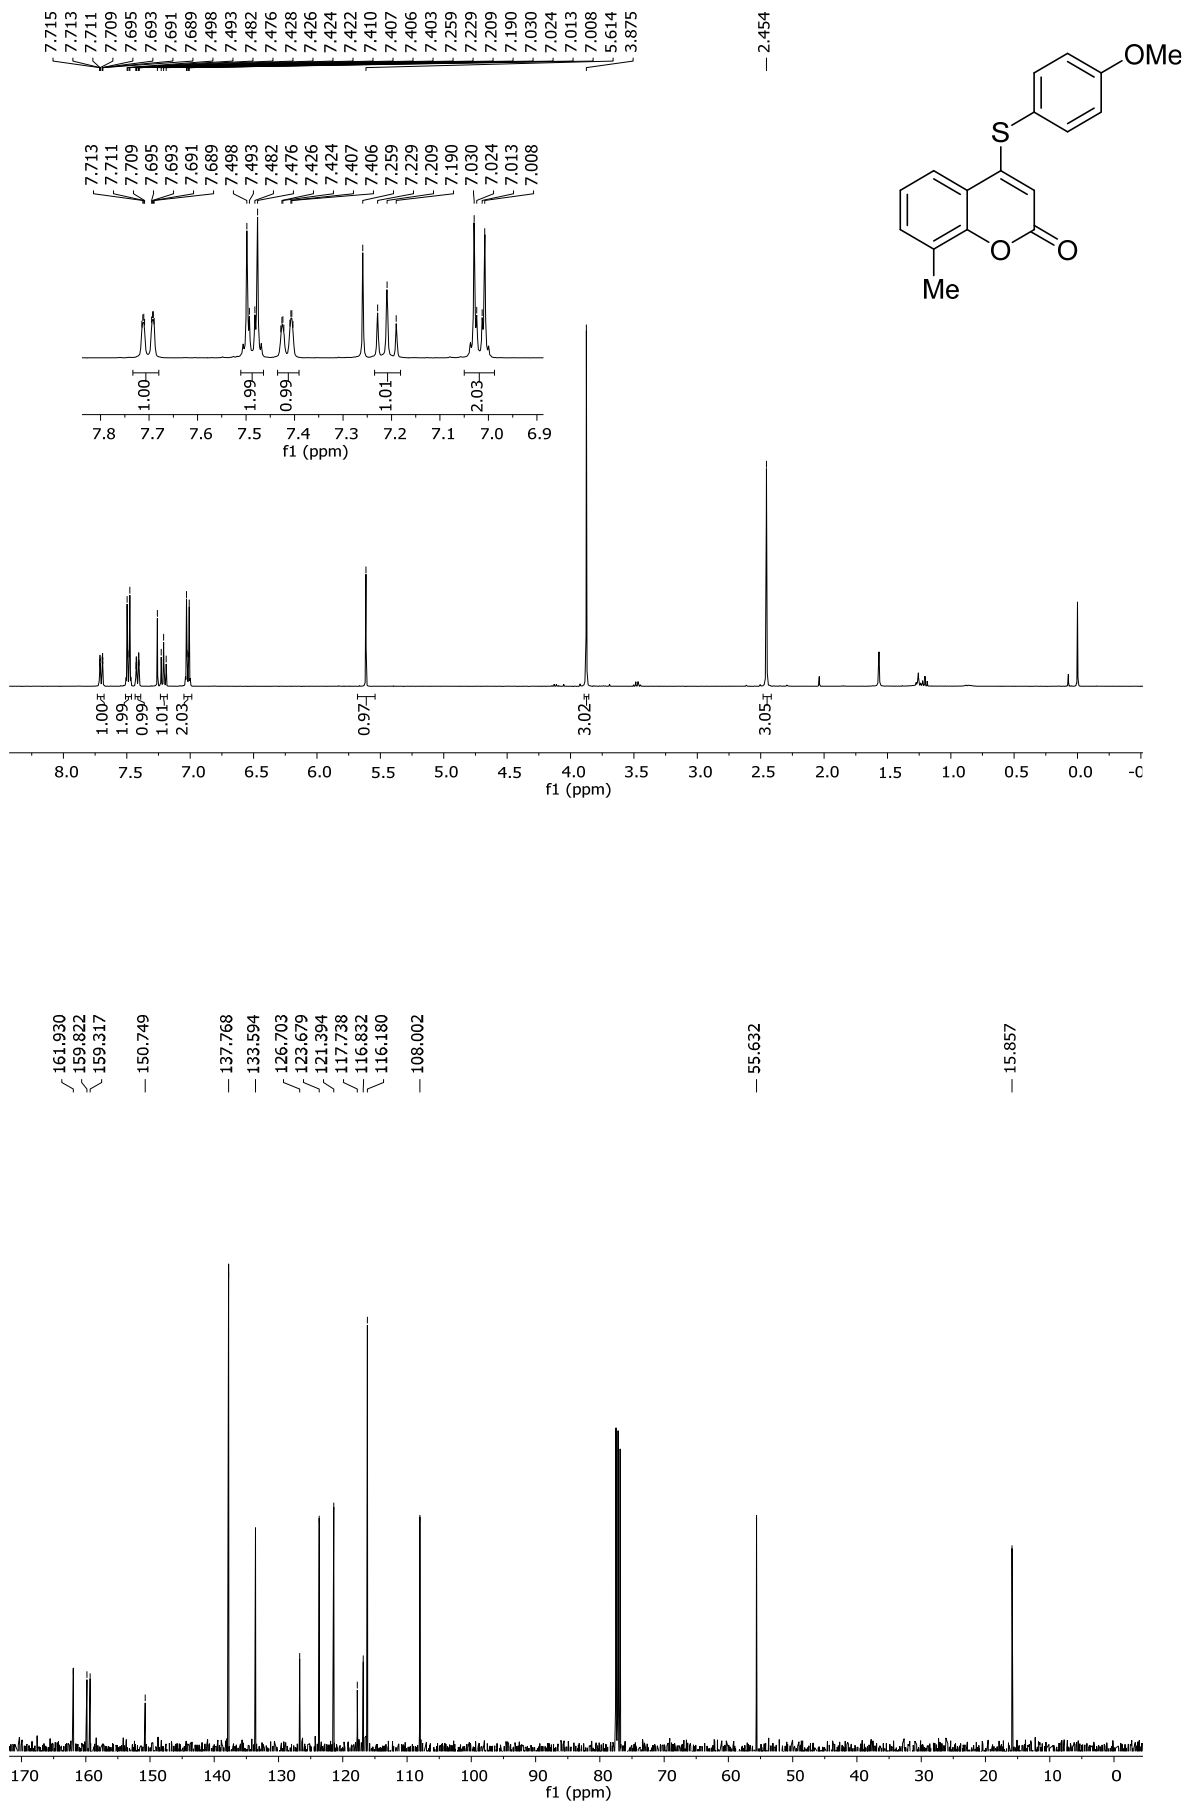

**Figure S12.** 400 MHz <sup>1</sup>H (top) and <sup>13</sup>C (bottom) NMR spectra of **31** in CDCl<sub>3</sub>.

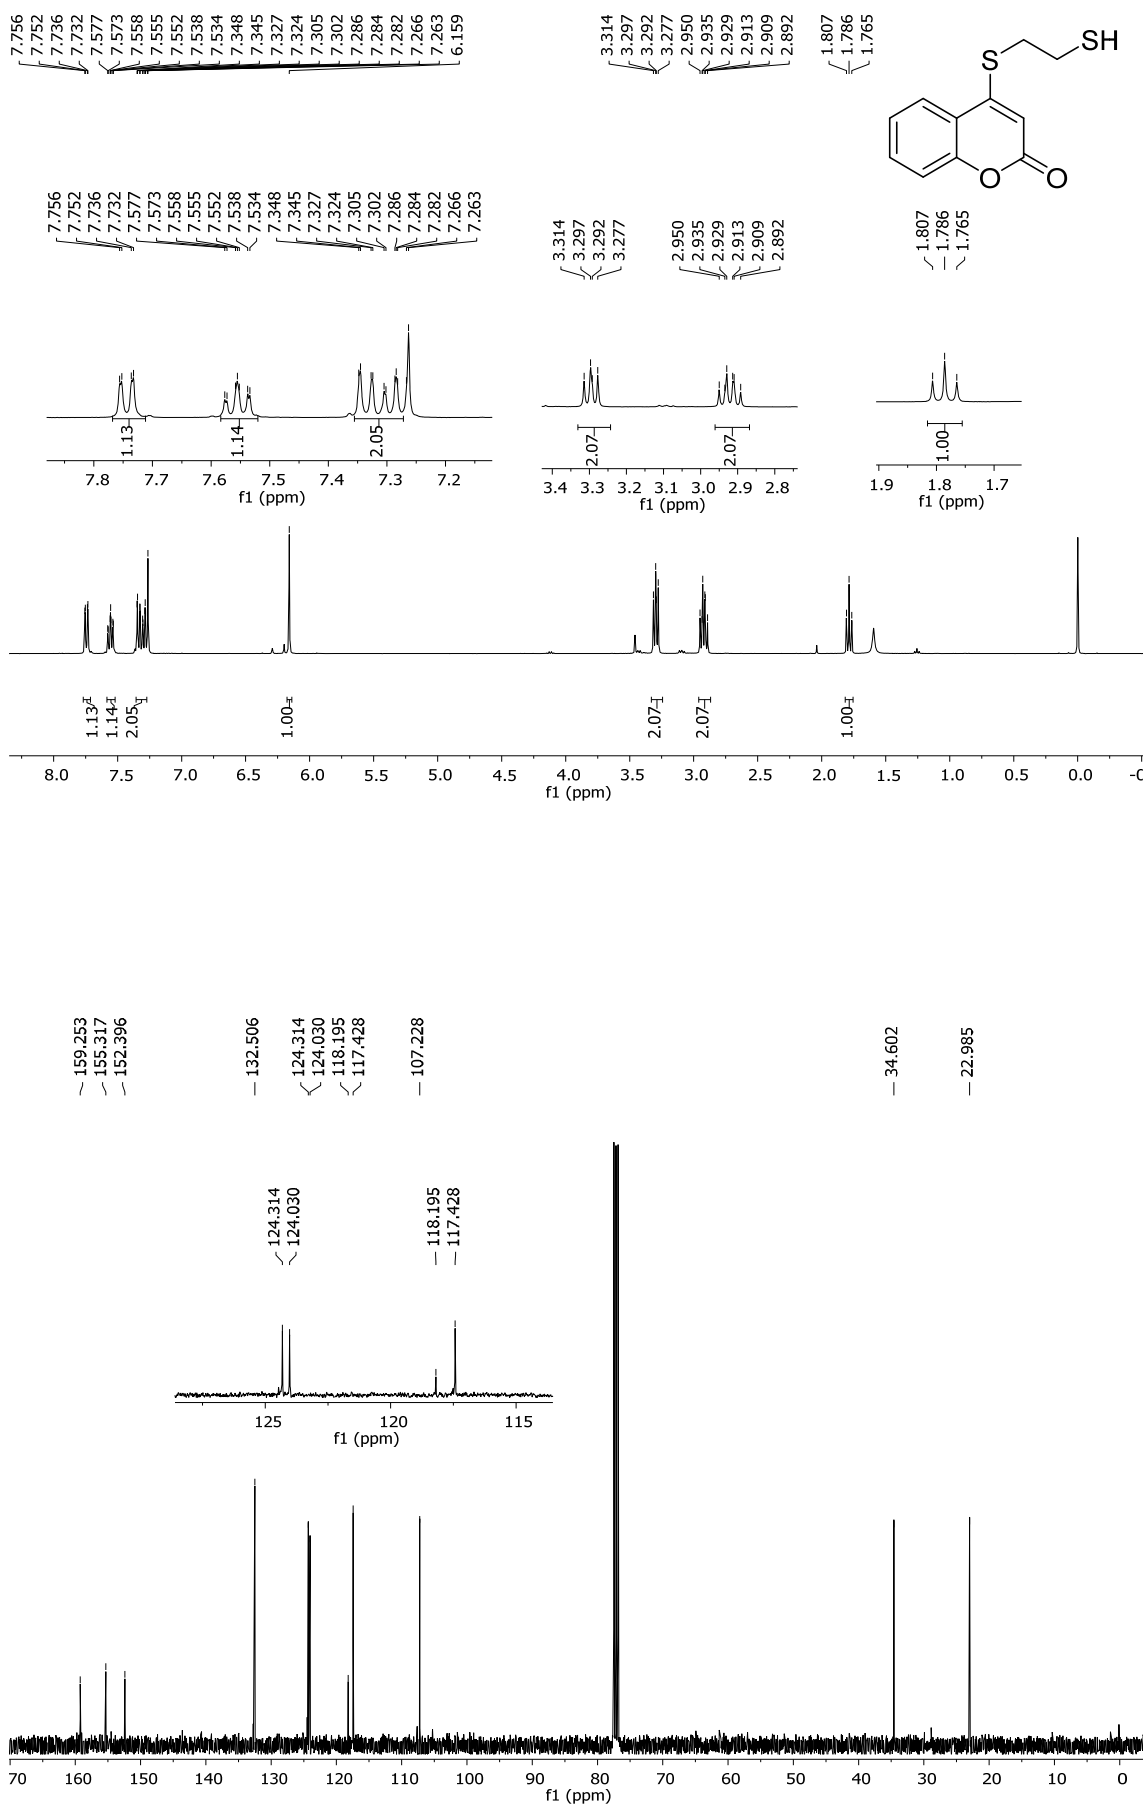

**Figure S13.** 400 MHz <sup>1</sup>H (top) and <sup>13</sup>C (bottom) NMR spectra of **6a** in CDCl<sub>3</sub>.

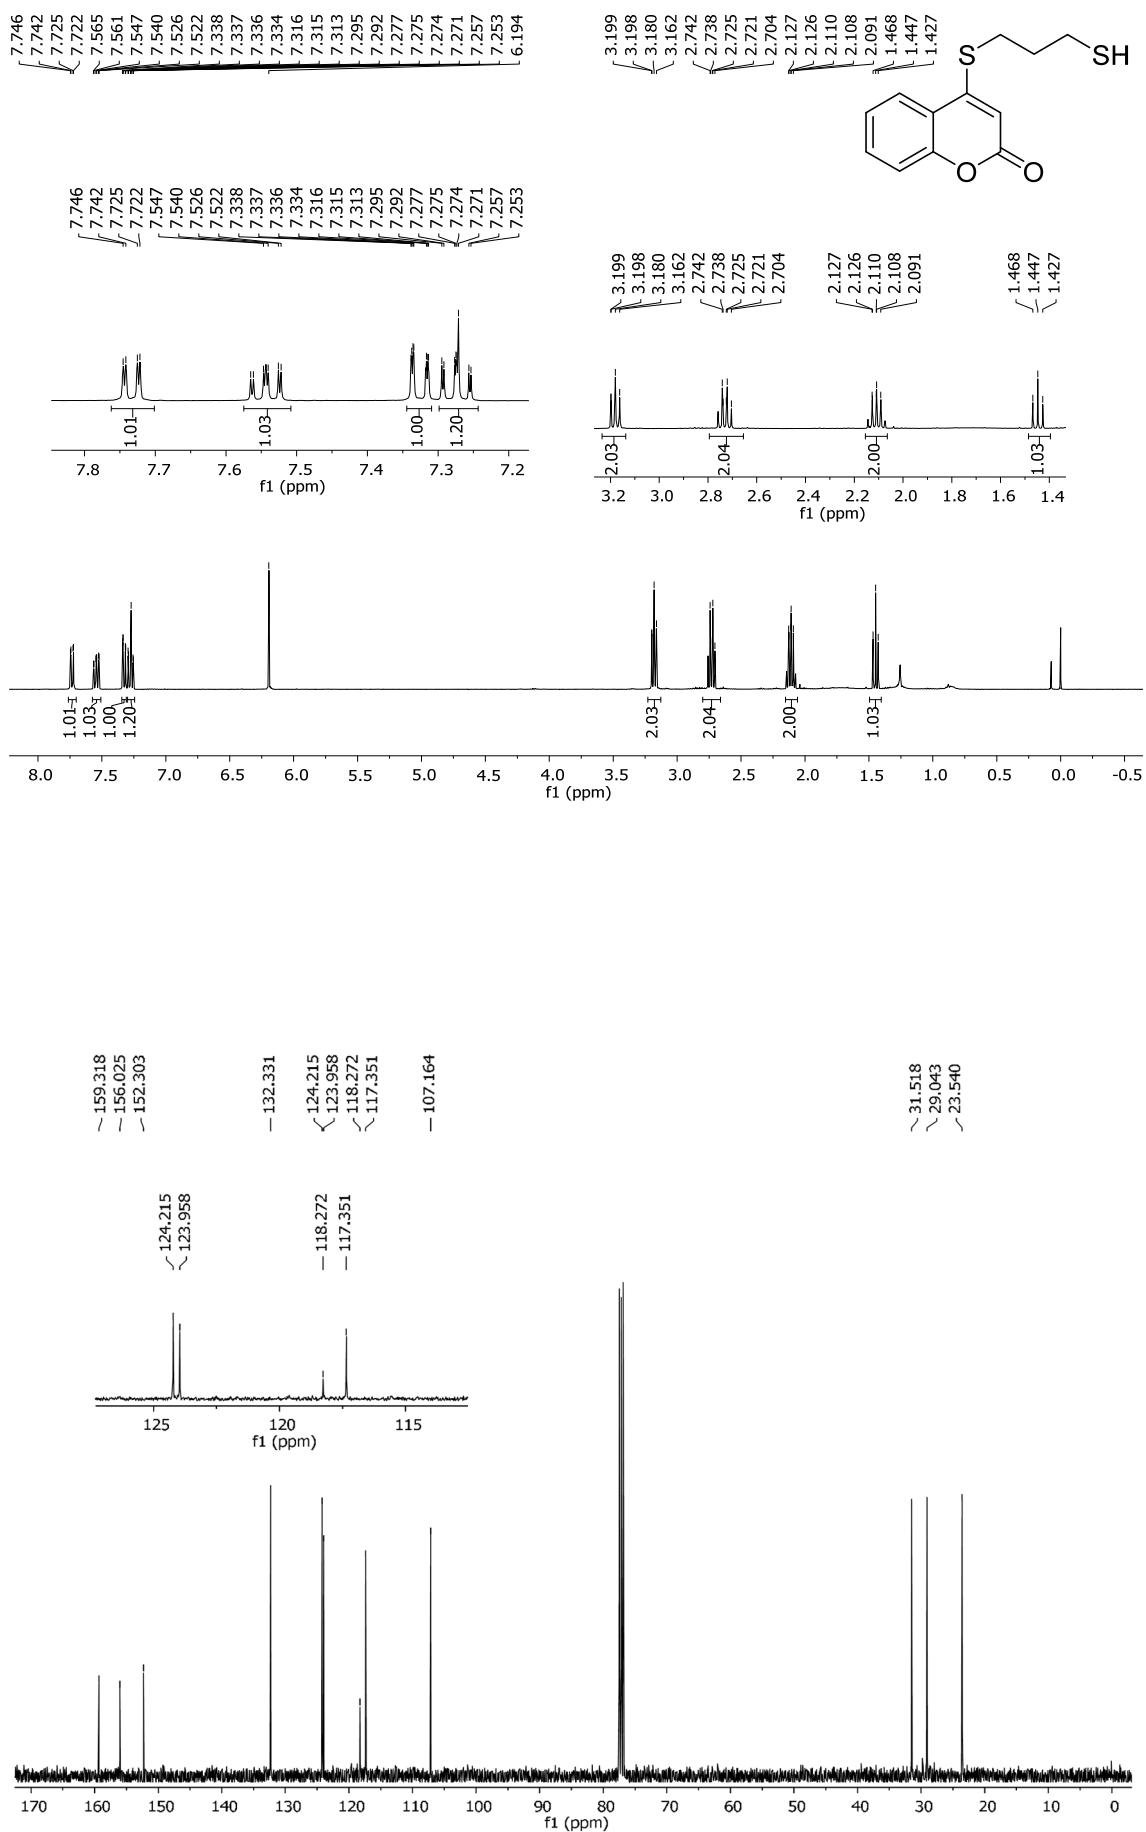

Figure S14. 400 MHz <sup>1</sup>H (top) and <sup>13</sup>C (bottom) NMR spectra of **6b** in CDCl<sub>3</sub>.



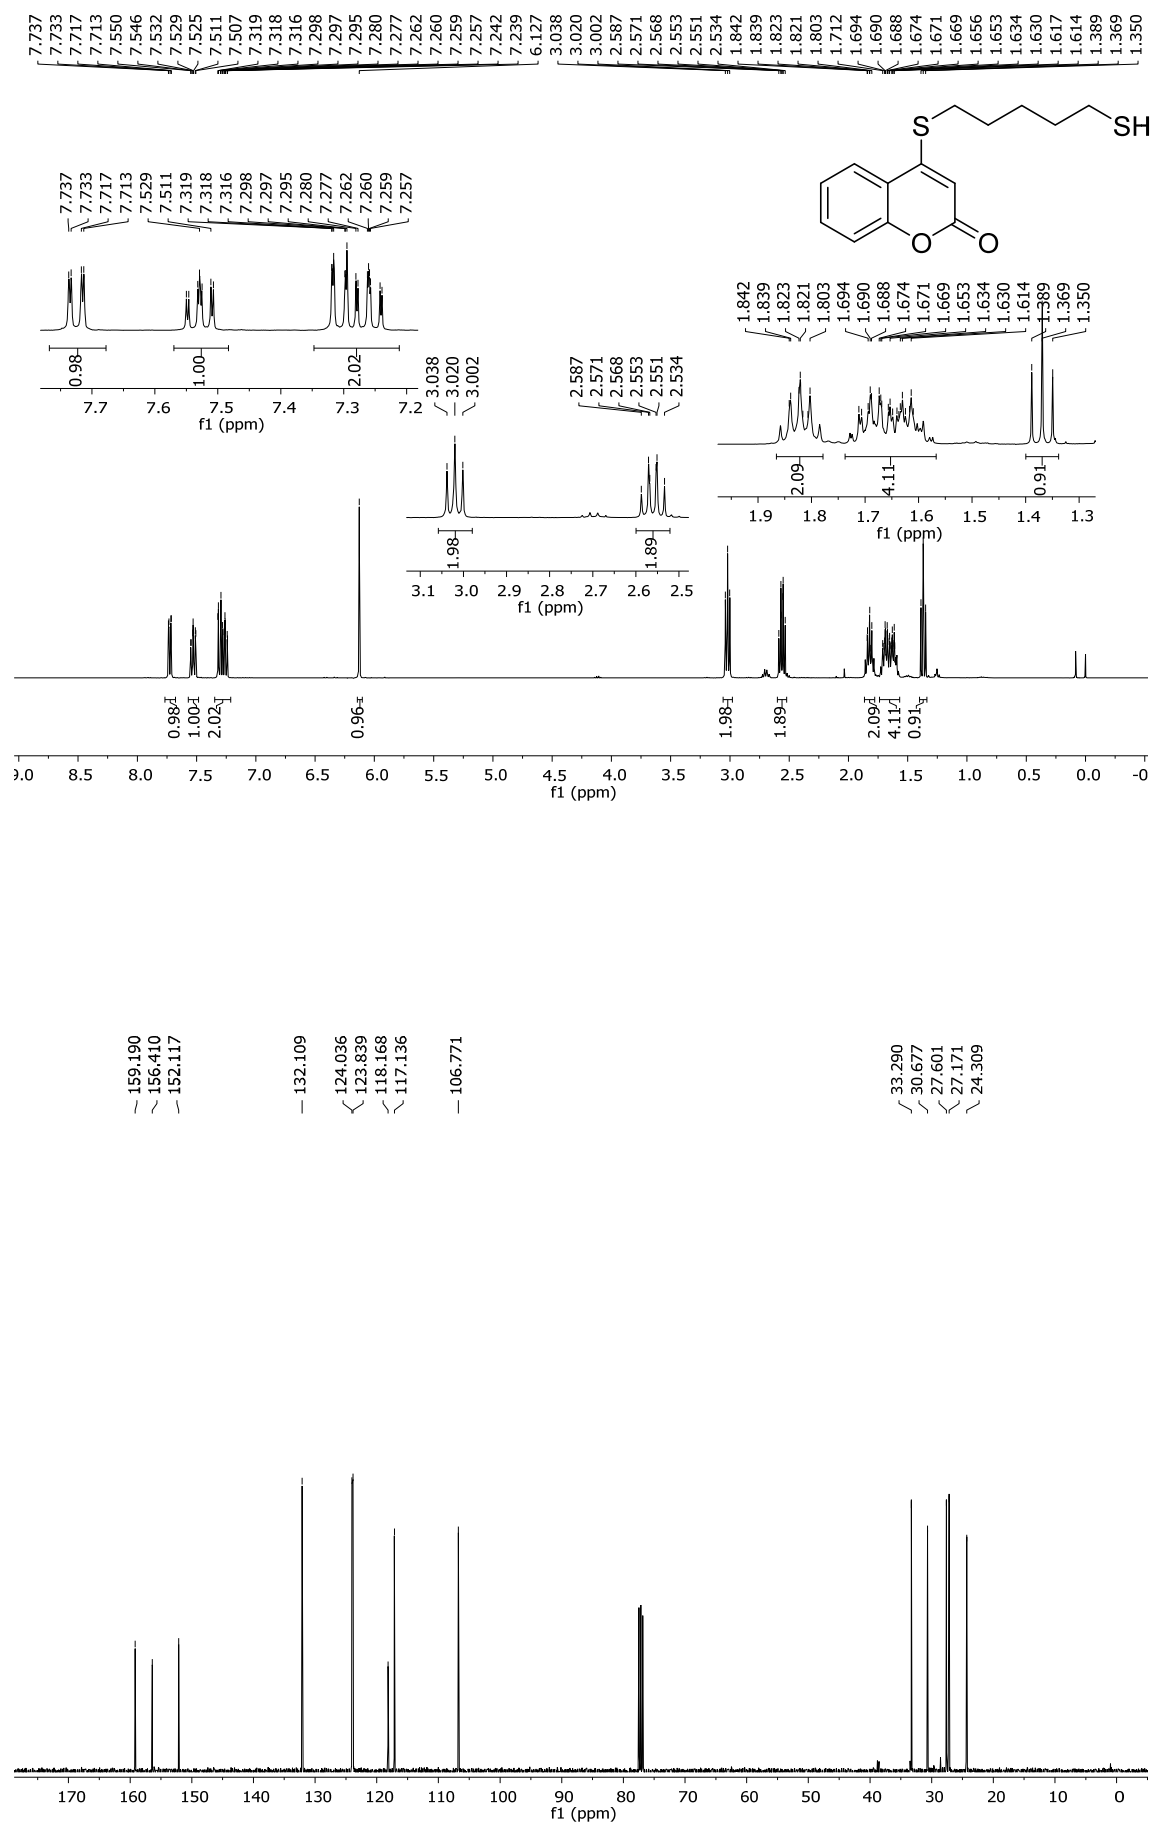

Figure S15. 400 MHz <sup>1</sup>H (top) and <sup>13</sup>C (bottom) NMR spectra of **6c** in CDCl<sub>3</sub>.

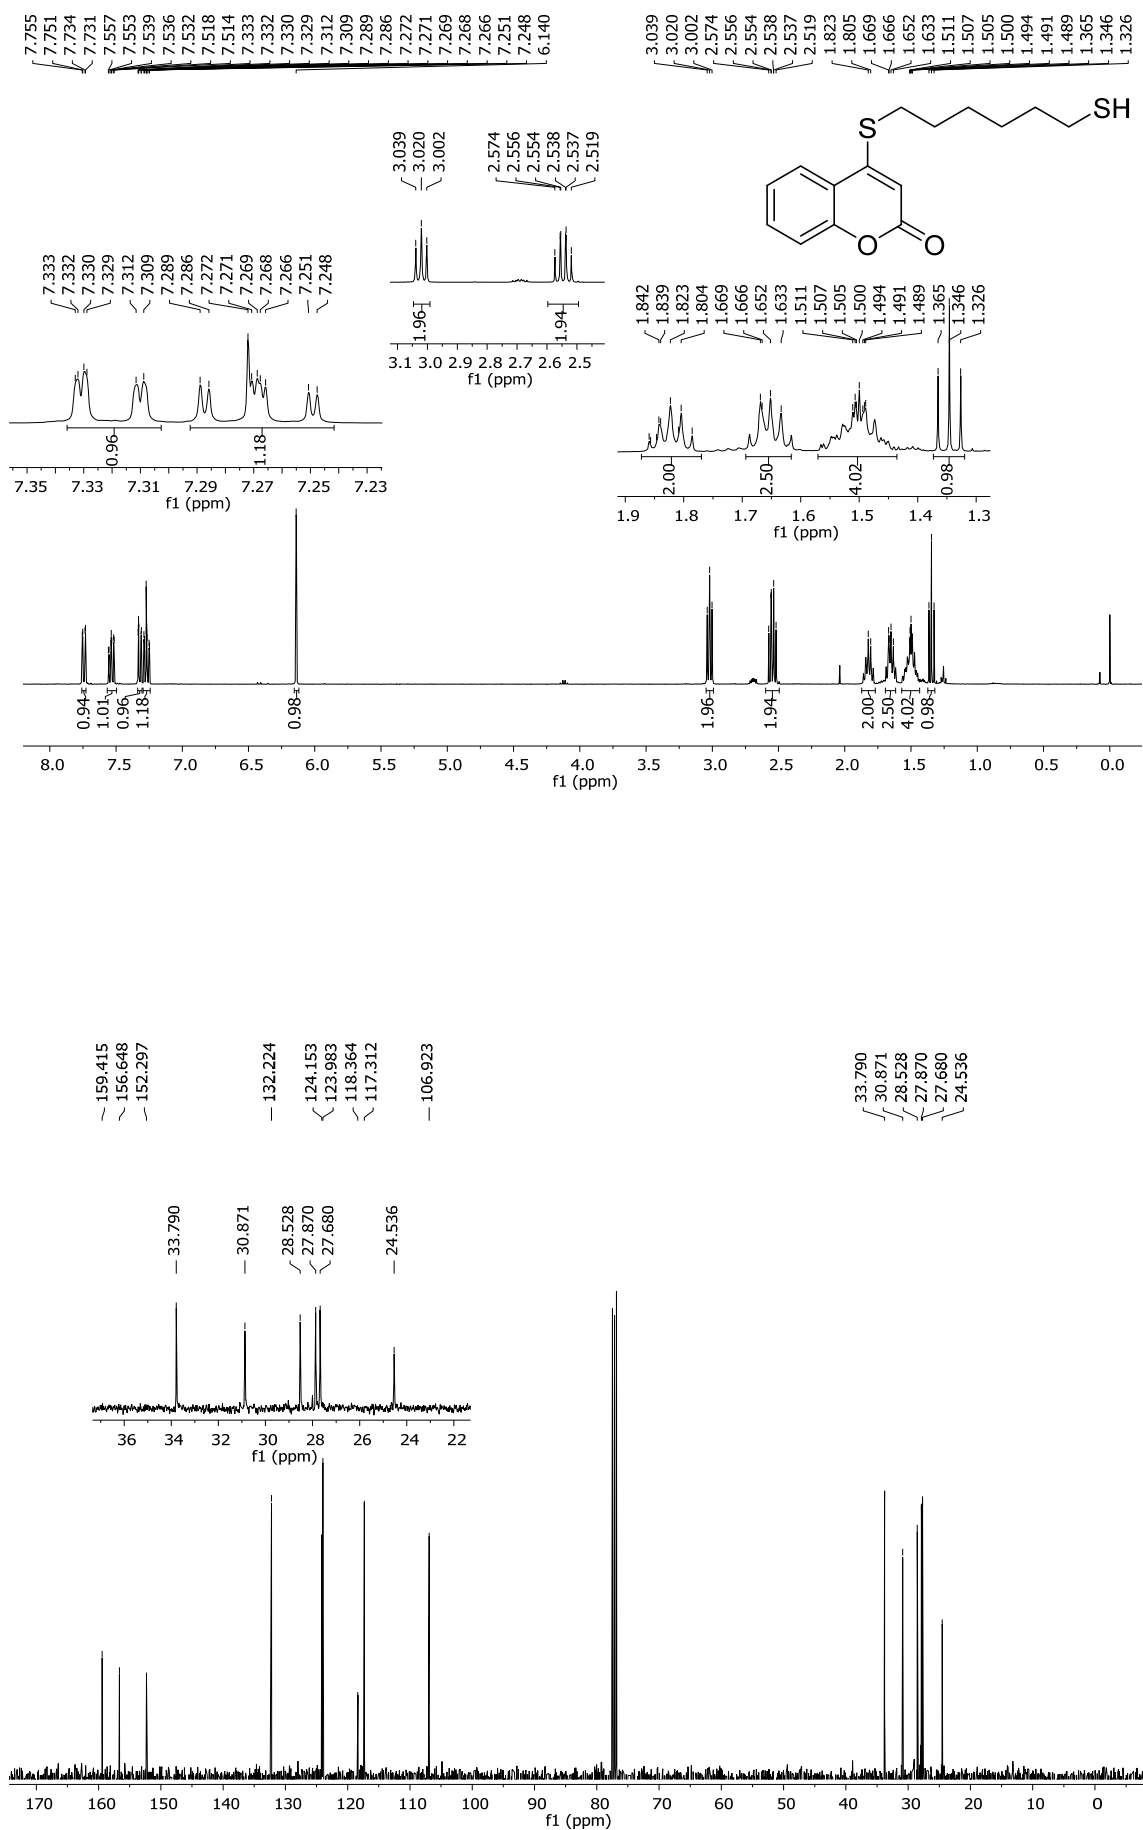

Figure S16. 400 MHz <sup>1</sup>H (top) and <sup>13</sup>C (bottom) NMR spectra of **6d** in CDCl<sub>3</sub>.

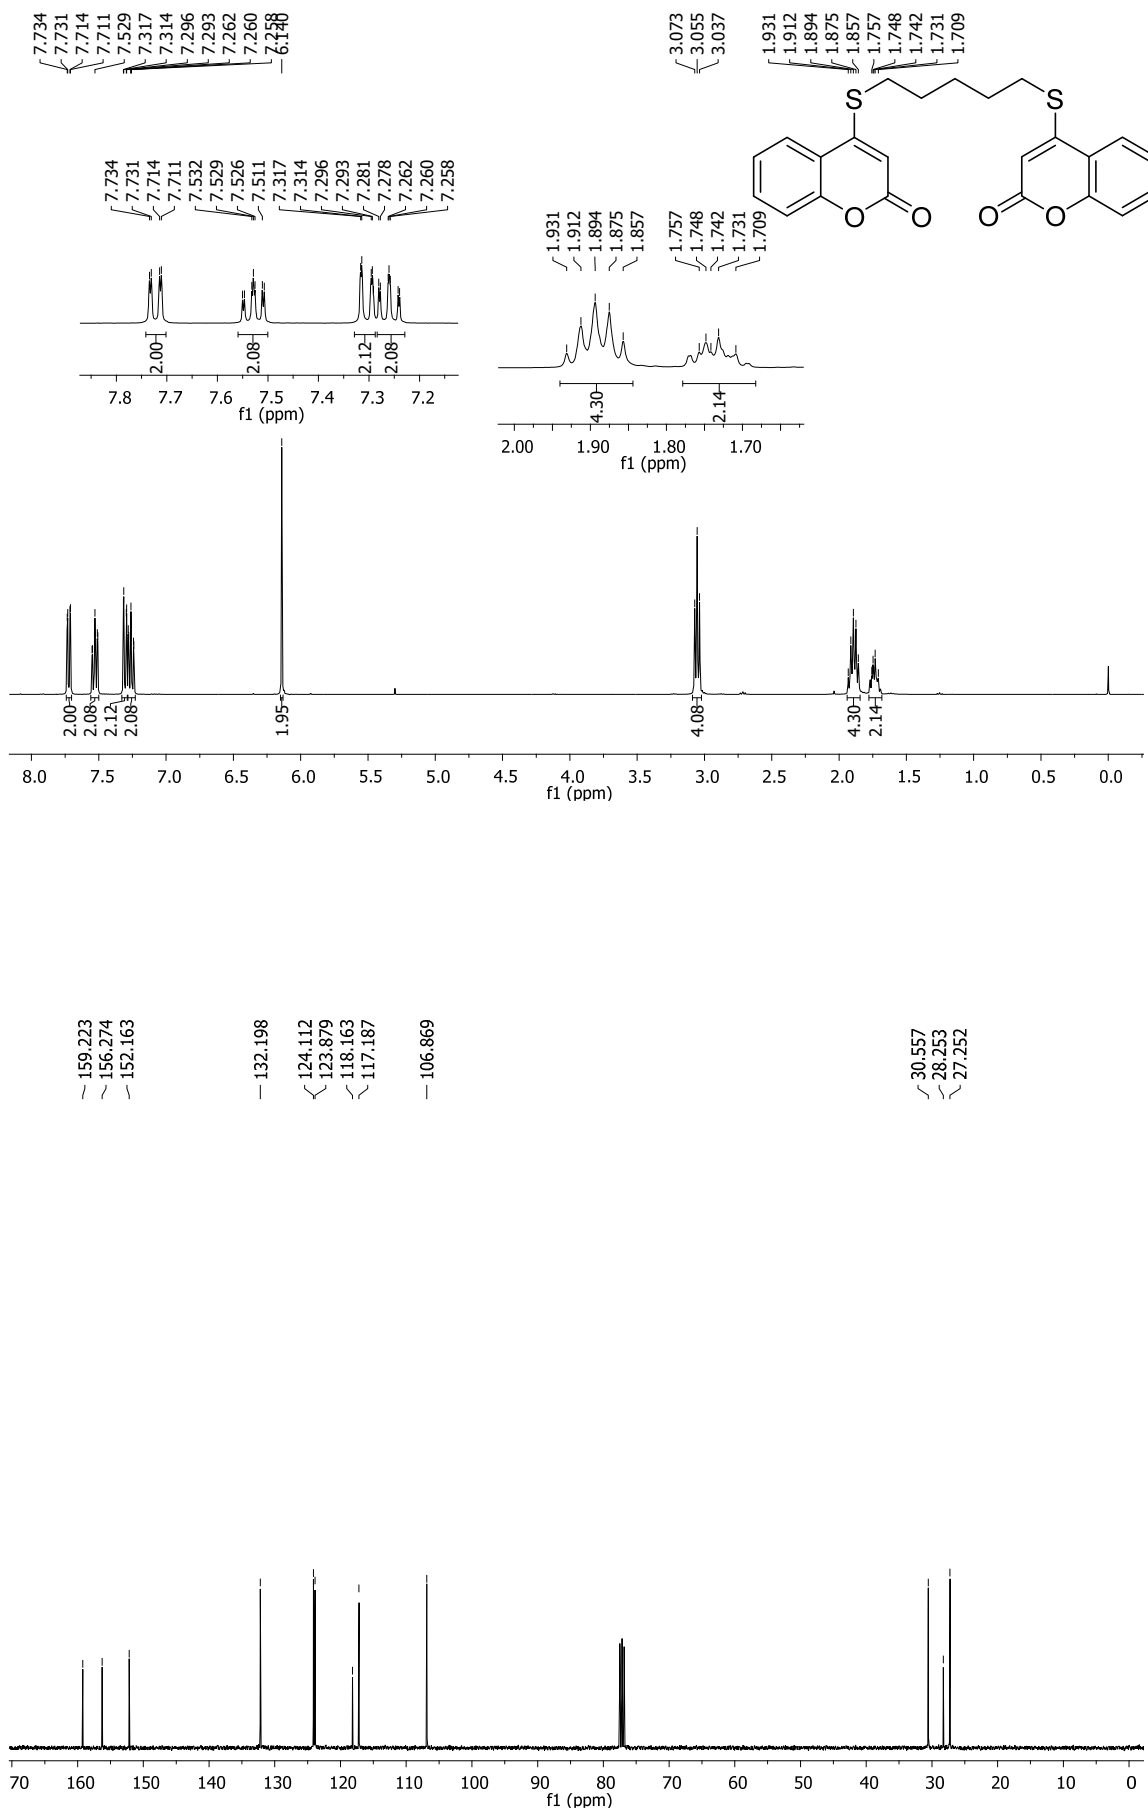

**Figure S17.** 400 MHz <sup>1</sup>H (top) and <sup>13</sup>C (bottom) NMR spectra of **7a** in CDCl<sub>3</sub>.

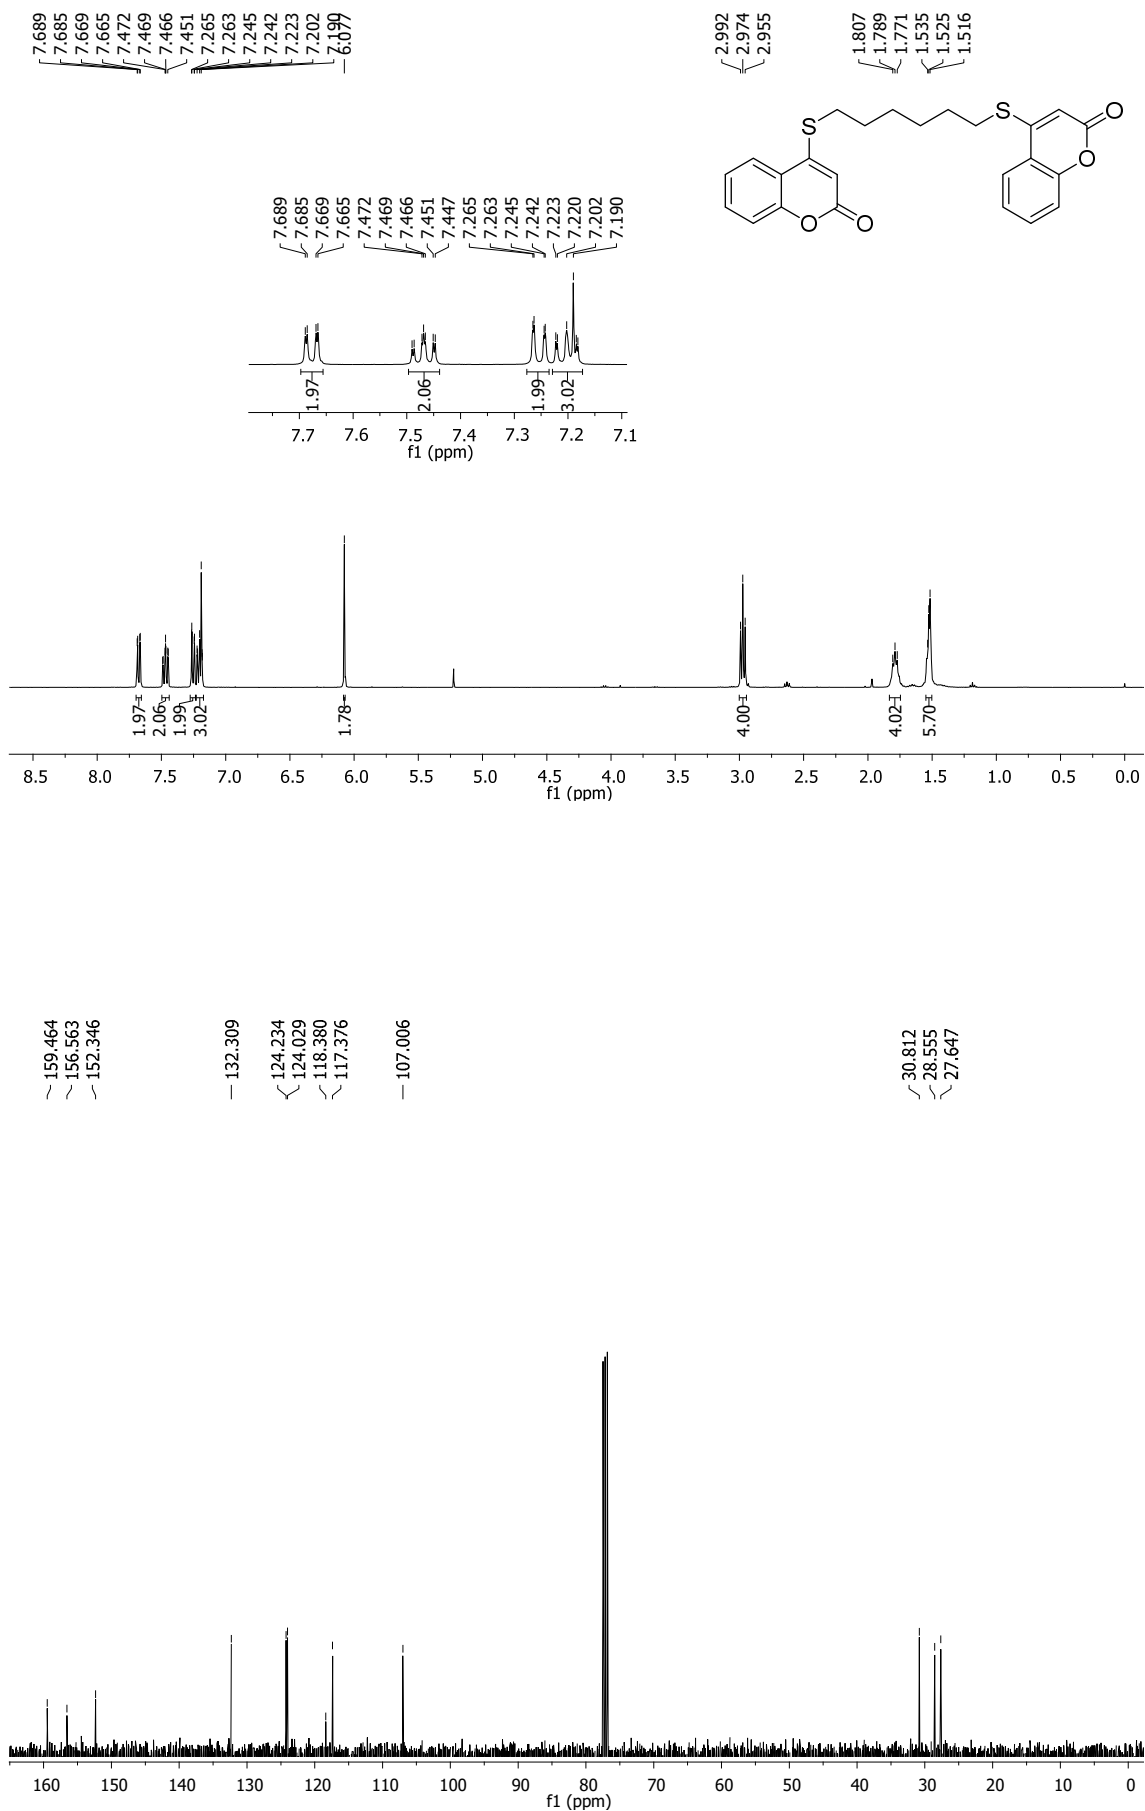

Figure S18. 400 MHz <sup>1</sup>H (top) and <sup>13</sup>C (bottom) NMR spectra of **7b** in CDCl<sub>3</sub>.
